# Supplementary material for: Chemical Composition of Commercial Cannabis
Source: PubMed Central journal article supplement — J Agric Food Chem. 2024 Jan 5;72(25):14099–113. doi: 10.1021/acs.jafc.3c06616 (PMC11212042; doi:10.1021/acs.jafc.3c06616), 2024-01-05
Supplement: jf3c06616_si_001.pdf [file jf3c06616_si_001.pdf]

SUPPORTING INFORMATION for

# The Chemical Composition of Commercial Cannabis

David S. Wishart<sup>1,2,3,4</sup>, Mickel Hiebert-Giesbrecht<sup>1</sup>, Gozal Inchehborouni<sup>1</sup>, Xuan Cao<sup>1</sup>, An Chi Guo<sup>1</sup>, Marcia A. LeVatte<sup>1</sup>, Claudia Torres-Calzada<sup>1</sup>, Vasuk Gautam<sup>1</sup>, Mathew Johnson<sup>1</sup>, Jaanus Liigand<sup>1</sup>, Fei Wang<sup>2</sup>, Shirin Zahrei<sup>1</sup>, Sudarshana Bhumireddy<sup>1</sup>, Yilin Wang<sup>1</sup>, Jiamin Zheng<sup>1</sup>, Rupasri Mandal<sup>1</sup>, Jason R.B. Dyck<sup>5</sup>

<sup>1</sup> Department of Biological Sciences, University of Alberta, Edmonton, AB, Canada T6G 2E9

<sup>2</sup> Department of Computing Science, University of Alberta, Edmonton, AB, Canada T6G 2E8

<sup>3</sup> Faculty of Pharmacy and Pharmaceutical Sciences, University of Alberta, Edmonton, AB, Canada T6G 2H7

<sup>4</sup> Department of Laboratory Medicine and Pathology, University of Alberta, Edmonton, AB, Canada T6G 2R3

<sup>5</sup> Department of Pediatrics, University of Alberta, Edmonton, AB, Canada, T6G 1C9

\* Correspondence: [dwishart@ualberta.ca](mailto:dwishart@ualberta.ca)

# Table of contents

## Materials and methods (pages 3-9)

- Page 3-4.** **Table S1.** Detailed chemical and vendor information for metabolites in the common plant metabolite assay.
- Page 5-7.** **Table S2.** List of vendors and/or concentrations of cannabinoid certified reference material standards, their peak-picking standards, terpene mixtures and polyphenols used in the cannabinoid, terpenoid, pesticide and polyphenol assays.
- Page 8.** Methods for the separation, identification and quantification of cannabinoids by LC–MS/MS
- Page 8-9.** Methods for separation and quantification of polyphenols by UHPLC-MS.

## Results (pages 10-38)

- Page 10-11.** **Table S3.** Targeted GC-MS analysis of terpenoids in six cannabis cultivars.
- Page 12-22.** **Table S4.** Untargeted GC-MS analysis of terpenoids and volatile compounds.
- Page 23.** **Table S5.** Cannabinoids quantified using a targeted LC-MS/MS metabolomics assay.
- Page 24.** **Table S6.** Targeted LC-MS/MS analysis of phenolic compounds found in cannabis.
- Page 25-26.** **Table S7.** Pesticides quantified in select cannabis cultivars.
- Page 27-29.** **Table S8.** Common plant metabolites detected in cannabis cultivars using TMIC Plant Prime assay.
- Page 30.** **Table S9.** Trace elemental analysis using ICP-MS.
- Page 31.** **Table S10.** Validation data for the targeted GC-MS assay for selected terpenoids.
- Page 32.** **Table S11.** Validation data for the LC-MS/MS assay for cannabinoids.
- Page 33.** **Table S12.** Validation data for the LC-MS/MS assay for polyphenols and phenolic acids.
- Page 34-36.** **Table S13.** Validation data for the LC-MS/MS assay for pesticides.
- Page 37.** **Table S14.** Validation data for the LC-MS/MS assay for metal ions.
- Page 38.** **Figure S1.** A screenshot montage showing A) the CCD MetaboCard for cannabidiol (CBD000002), B) the Search by molecular weight option with one of the results shown and C) the GC-MS Search option for glycolic acid (CDB004803).

## Material and Methods:

**Table S1.** Detailed chemical and vendor information for metabolites in the common plant metabolite assay.

| Chemical subclass and chemicals                                                                                                                                                                                                                                                                                                                                                                                                                                                                   | Vendors                                 |
|---------------------------------------------------------------------------------------------------------------------------------------------------------------------------------------------------------------------------------------------------------------------------------------------------------------------------------------------------------------------------------------------------------------------------------------------------------------------------------------------------|-----------------------------------------|
| <p><b>Acids: <math>\alpha</math>-or <math>\gamma</math>-keto, <math>\alpha</math>-or <math>\beta</math>-hydroxy, mono, di or tricarboxylic</b></p> <p>citric acid, fumaric acid, glutaric acid, <math>\beta</math>-hydroxybutyric acid, 5-hydroxyindoleacetic acid, indole-3-acetic acid, <math>\alpha</math>-ketoglutaric acid, lactic acid, malic acid, methylmalonic acid, nitro-tyrosine, oxalic acid, oxaloacetic acid, propionic acid, pyruvic acid, succinic acid, trans-aconitic acid</p> | <p>Sigma-Aldrich<br/>(Oakville, CA)</p> |
| <p><b>Amines or aminoxide or phenethylamine (7)</b></p> <p>histamine, phenylethylamine, putrescine, spermidine, spermine, trimethylamine N-oxide (TMAO), tyramine</p>                                                                                                                                                                                                                                                                                                                             |                                         |
| <p><b>Amino acids, peptides and analogues (3)</b></p> <p>alanine, arginine, asparagine, aspartic acid, asymmetric dimethylarginine (ADMA), betaine, citrulline, creatine, creatinine, glutamine, glutamic acid, glycine, histidine, homoserine, levodopa (DOPA), leucine, isoleucine, kynurenine, lysine, methionine, 3-methylhistidine, ornithine, phenylalanine, proline, sarcosine, serine, threonine, trans-hydroxyproline, tyrosine, tryptophan, valine</p>                                  |                                         |
| <p><b>Alcohols and polyols (1)</b></p> <p>shikimic acid</p>                                                                                                                                                                                                                                                                                                                                                                                                                                       |                                         |
| <p><b>Benzoic acids and derivatives; phenylpropanionic acid; benzenoids; benzenediols, methoxyphenol (4)</b></p> <p>benzoic acid, dopamine, hippuric acid, <i>p</i>-hydroxyphenylacetic acid</p>                                                                                                                                                                                                                                                                                                  |                                         |
| <p><b>Carbohydrate and carbohydrate conjugates (3)</b></p> <p>glyceric acid, glucose, <math>^{13}\text{C}_6</math>-glucose</p>                                                                                                                                                                                                                                                                                                                                                                    |                                         |
| <p><b>Carnitines (10)</b></p> <p>acetyl-L-carnitine hydrochloride, propionyl-L-carnitine, butyryl-L-carnitine, hexanoyl-L-carnitine, octanoyl-L-carnitine, decanoyl-L-carnitine, dodecanoyl-L-carnitine, tetradecanoyl-L-carnitine, hexadecanoyl-L-carnitine, octadecanoyl-L-carnitine</p>                                                                                                                                                                                                        |                                         |
| <p><b>Fatty acid and conjugates (2)</b></p> <p>butyric acid, valeric acid</p>                                                                                                                                                                                                                                                                                                                                                                                                                     |                                         |
| <p><b>Organosulfonic acids and derivatives (1)</b></p> <p>taurine</p>                                                                                                                                                                                                                                                                                                                                                                                                                             |                                         |
| <p><b>Phosphatidylcholines (8)</b></p>                                                                                                                                                                                                                                                                                                                                                                                                                                                            |                                         |

|                                                                                                                                                                                                                                                                                                                                                                                                                                                                                                                                                                                                                                                                                                                                                                                                                                                                                                                                                                             |                                                        |
|-----------------------------------------------------------------------------------------------------------------------------------------------------------------------------------------------------------------------------------------------------------------------------------------------------------------------------------------------------------------------------------------------------------------------------------------------------------------------------------------------------------------------------------------------------------------------------------------------------------------------------------------------------------------------------------------------------------------------------------------------------------------------------------------------------------------------------------------------------------------------------------------------------------------------------------------------------------------------------|--------------------------------------------------------|
| N-stearoyl-D-erythro-sphingosylphosphorylcholine, 1,2-dilinolenoyl-sn-glycero-3-phosphocholine, 1,2-dioctadecanoyl-sn-glycero-3-phosphocholine, 1-oleoyl-2-hydroxy-sn-glycero-3-phosphocholine, 1,2-dimyristoyl-sn-glycero-3-phosphocholine, 1,2-diarachidoyl-sn-glycero-3-phosphocholine, 1-nonanoyl-2-hydroxy-sn-glycero-3-phosphocholine, N-hexanoyl-D-erythro-sphingosylphosphorylcholine                                                                                                                                                                                                                                                                                                                                                                                                                                                                                                                                                                               |                                                        |
| <b>Plant hormones (4)</b><br>abscisic acid, jasmonic acid, salicylic acid, zeatin                                                                                                                                                                                                                                                                                                                                                                                                                                                                                                                                                                                                                                                                                                                                                                                                                                                                                           |                                                        |
| <b>Quaternary ammonium salts (2)</b><br>L-carnitine inner salt, choline                                                                                                                                                                                                                                                                                                                                                                                                                                                                                                                                                                                                                                                                                                                                                                                                                                                                                                     | Sigma-Aldrich<br>(Oakville, CA)                        |
| <b>Tryptamines and derivatives (1):</b> serotonin                                                                                                                                                                                                                                                                                                                                                                                                                                                                                                                                                                                                                                                                                                                                                                                                                                                                                                                           |                                                        |
| <b>Carboximidic acids:</b> N <sup>1</sup> , N <sup>12</sup> -diacetylspermine hydrochloride<br><b>Amino acids, peptides and analogues:</b> proline-betaine                                                                                                                                                                                                                                                                                                                                                                                                                                                                                                                                                                                                                                                                                                                                                                                                                  | Cayman Chemical<br>(Ann Arbor, MI)                     |
| <b>(D, <sup>13</sup>C, <sup>15</sup>N)-labelled internal standards (ISTD)</b><br>D <sub>2</sub> -ornithine, <sup>15</sup> N-histidine, D <sub>3</sub> -creatinine, D <sub>3</sub> -DOPA, D <sub>4</sub> -dopamine, <sup>13</sup> C-tyrosine, <sup>13</sup> C-D <sub>3</sub> -methionine, D <sub>3</sub> -proline, D <sub>4</sub> -serotonin, D <sub>4</sub> -putrescine, D <sub>3</sub> -sarcosine, <sup>13</sup> C <sub>2</sub> -taurine, D <sub>4</sub> -tyramine, <sup>15</sup> N-alanine, <sup>13</sup> C <sub>6</sub> -arginine, <sup>15</sup> N-asparagine, D <sub>3</sub> -aspartic acid, D <sub>7</sub> -citrulline, D <sub>3</sub> -glutamic acid, D <sub>5</sub> -glutamine, <sup>13</sup> C <sub>2</sub> -glycine, <sup>13</sup> C-leucine, <sup>15</sup> N-phenylalanine, <sup>13</sup> C-serine, D <sub>2</sub> -threonine, <sup>15</sup> N <sub>2</sub> -tryptophan, D <sub>8</sub> -valine, D <sub>9</sub> -TMAO and <sup>15</sup> N <sub>2</sub> -uric acid | Cambridge Isotope Laboratories Inc.<br>(Tewksbury, MA) |
| <b>ISTDs</b><br>Labelled carnitine standard set                                                                                                                                                                                                                                                                                                                                                                                                                                                                                                                                                                                                                                                                                                                                                                                                                                                                                                                             | Cambridge Isotope Laboratories Inc.<br>(Tewksbury, MA) |
| <b>ISTDs</b><br>D <sub>8</sub> -spermine tetrahydrochloride, D <sub>8</sub> -spermidine trihydrochloride                                                                                                                                                                                                                                                                                                                                                                                                                                                                                                                                                                                                                                                                                                                                                                                                                                                                    | IsoSciences (Ambler, PA)                               |
| <b>ISTDs</b><br>D <sub>6</sub> -N <sup>1</sup> , N <sup>12</sup> -diacetylspermine dihydrochloride and D <sub>6</sub> -ADMA                                                                                                                                                                                                                                                                                                                                                                                                                                                                                                                                                                                                                                                                                                                                                                                                                                                 | Toronto Research Chemicals (North York, CA)            |
| <b>ISTDs</b><br>D <sub>3</sub> -creatinine, D <sub>9</sub> -choline chloride, D <sub>9</sub> -betaine hydrochloride, 2-D <sub>1</sub> -sodium L-lactate, D <sub>4</sub> -sodium beta-hydroxybutyrate, 1- <sup>13</sup> C-alpha-ketoglutaric acid, D <sub>4</sub> -citric acid, 1- <sup>13</sup> C-butyric acid, 1- <sup>13</sup> C-propionic acid, D <sub>4</sub> -succinic acid, <sup>13</sup> C <sub>2</sub> -D <sub>2</sub> -fumaric acid, <sup>13</sup> C-pyruvic acid, D <sub>2</sub> -hippuric acid, methyl-D <sub>3</sub> -malonic acid, and D <sub>2</sub> -indole-3-acetic acid                                                                                                                                                                                                                                                                                                                                                                                    | C/D/N Isotopes Inc.<br>(Pointe-Claire, CA)             |

Abbreviations; D<sub>6</sub>-ADMA - asymmetric-dimethyl-d<sub>6</sub>-arginine; ISTDs - internal standards

**Table S2.** List of vendors and/or concentrations of cannabinoid certified reference material standards, their peak-picking standards, terpene mixtures and polyphenols used in the cannabinoid, terpenoid, pesticide and polyphenol assays.

| Compound                                                                                                                                                                                                                                                                                                                                                          | Vendor                           | Concentration               |
|-------------------------------------------------------------------------------------------------------------------------------------------------------------------------------------------------------------------------------------------------------------------------------------------------------------------------------------------------------------------|----------------------------------|-----------------------------|
| <b>Cannabinoid certified reference material standards</b>                                                                                                                                                                                                                                                                                                         |                                  |                             |
| $\Delta^9$ -tetrahydrocannabinol (THC)                                                                                                                                                                                                                                                                                                                            | Cerilliant Corp.                 | 1.000 mg/mL<br>methanol     |
| $\Delta^9$ -tetrahydrocannabinolic acid A (THCA)                                                                                                                                                                                                                                                                                                                  | Cerilliant Corp.                 | 1.000 mg/mL<br>acetonitrile |
| tetrahydrocannabivarin (THCV)                                                                                                                                                                                                                                                                                                                                     | Cerilliant Corp.                 | 1.000 mg/mL<br>methanol     |
| cannabidiol (CBD)                                                                                                                                                                                                                                                                                                                                                 | Cerilliant Corp.                 | 1.000 mg/mL<br>methanol     |
| cannabidiolic acid (CBDA)                                                                                                                                                                                                                                                                                                                                         | Cerilliant Corp.                 | 1.000 mg/mL<br>acetonitrile |
| cannabichromene (CBC)                                                                                                                                                                                                                                                                                                                                             | Cerilliant Corp.                 | 1.000 mg/mL<br>methanol     |
| cannabigerol (CBG)                                                                                                                                                                                                                                                                                                                                                | Cerilliant Corp.                 | 1.000 mg/mL<br>methanol     |
| cannabinol (CBN)                                                                                                                                                                                                                                                                                                                                                  | Cerilliant Corp.                 | 1.000 mg/mL<br>methanol     |
| <b>Terpene mixtures</b>                                                                                                                                                                                                                                                                                                                                           |                                  |                             |
| <b>Terpene Mixture 1 (21 compounds)</b><br>3-carene, camphene, fenchone, camphor, menthol, geranyl acetate, cis-nerolidol, cedrol, $\alpha$ -bisabolol, linalool, trans-caryophyllene, farnesenes (mix of isomers), $\beta$ -myrcene, caryophyllene oxide, ocimene (mix of isomers), $\alpha$ -phellandrene, eucalyptol, valencene, isopulegol, nerol, isoborneol | Cayman Chemical (Ann Arbor, MI). | 1000 $\mu$ g/mL<br>methanol |
| <b>Terpene Mixture 2 (16 compounds)</b><br>$\alpha$ -pinene, $\beta$ -pinene, $\alpha$ -terpinene, R-(+)-limonene, $\gamma$ -terpinene, fenchyl alcohol, $\alpha$ -humulene, trans-nerolidol, terpinolene, borneol, terpineol (mix of isomers), geraniol, guaial, sabinene hydrate, sabinene, and pulegone                                                        | Cayman Chemical (Ann Arbor, MI). | 1000 $\mu$ g/mL<br>methanol |
| <b>Peak-picking standards</b>                                                                                                                                                                                                                                                                                                                                     |                                  |                             |
| $\Delta^8$ -tetrahydrocannabinol ( $\Delta^8$ -THC)                                                                                                                                                                                                                                                                                                               | Cerilliant Corp.                 | 1.000 mg/mL                 |

|                                                                                                                                                                                                                                                                                                                                                                                               |                                                        |                             |
|-----------------------------------------------------------------------------------------------------------------------------------------------------------------------------------------------------------------------------------------------------------------------------------------------------------------------------------------------------------------------------------------------|--------------------------------------------------------|-----------------------------|
|                                                                                                                                                                                                                                                                                                                                                                                               |                                                        | methanol                    |
| cannabigerolic acid (CBGA)                                                                                                                                                                                                                                                                                                                                                                    | Cerilliant Corp.                                       | 1.000 mg/mL<br>acetonitrile |
| cannabicyclol (CBL)                                                                                                                                                                                                                                                                                                                                                                           | Cerilliant Corp.                                       | 1.000 mg/mL<br>acetonitrile |
| cannabidivarin (CBDV)                                                                                                                                                                                                                                                                                                                                                                         | Cerilliant Corp.                                       | 1.000 mg/mL<br>methanol     |
| cannabidivarinic acid (CBDVA)                                                                                                                                                                                                                                                                                                                                                                 | Cerilliant Corp.                                       | 1.000 mg/mL<br>acetonitrile |
| beta-eudesmol                                                                                                                                                                                                                                                                                                                                                                                 | Sigma-Aldrich (St Louis, MO).                          |                             |
| bulnesol                                                                                                                                                                                                                                                                                                                                                                                      | Sigma-Aldrich (St Louis, MO).                          |                             |
| <b>Polyphenols</b>                                                                                                                                                                                                                                                                                                                                                                            |                                                        |                             |
| 3,4-dihydroxybenzoic acid, caffeic acid, catechin hydrate, p-coumaric acid, ferulic acid, gallic acid monohydrate, gallocatechin, piceol, protocatechuic aldehyde, pungenol, vanillic acid                                                                                                                                                                                                    | Sigma-Aldrich (St Louis, MO).                          |                             |
| Vanillin                                                                                                                                                                                                                                                                                                                                                                                      | Fluka (Mexico City, MX)                                |                             |
| Quercetin                                                                                                                                                                                                                                                                                                                                                                                     | Cayman Chemical (Ann Arbor, MI)                        |                             |
| Apigenin                                                                                                                                                                                                                                                                                                                                                                                      | AK Scientific (Union City, CA)                         |                             |
| <b>Polyphenol ISTDs</b>                                                                                                                                                                                                                                                                                                                                                                       |                                                        |                             |
| <sup>13</sup> C3-ferulic acid                                                                                                                                                                                                                                                                                                                                                                 | Sigma (Oakville, Canada)                               |                             |
| d <sub>5</sub> -apigenin, <sup>13</sup> C3-caffeic acid, d <sub>3</sub> -quercetin                                                                                                                                                                                                                                                                                                            | Toronto Research Chemicals (North York, Canada)        |                             |
| <sup>13</sup> C3-catechin                                                                                                                                                                                                                                                                                                                                                                     | Cambridge Isotope Laboratories Inc. (Tewksbury, U.S.A) |                             |
| d <sub>6</sub> -coumaric acid, d <sub>2</sub> -gallic acid, d <sub>3</sub> -vanillic acid, and d <sub>3</sub> -vanillin                                                                                                                                                                                                                                                                       | C/D/N Isotopes Inc. (Pointe-Claire, Canada).           |                             |
| <b>Pesticides</b>                                                                                                                                                                                                                                                                                                                                                                             |                                                        |                             |
| Acephate, acetomiprid, aldicarb, allethrin, azoxystrobin, benzovindiflupyr, bifenazate, boscalid, buprofezin, carbaryl, carbofuran, chlorantraniliprole, chlorpyrifos, clofentezine, clothianidin, coumaphos, cyantraniliprole, cyprodinil, diazinon, dichlorvos, dimethoate, dinotefuran, dodemorph, ethoprophos, etofenprox, etoxazole, fenoxycarb, fenpyroximate, fensulfothion, fenthion, | SPEX CertiPrep (Metuchen, NJ)                          | 100 µg/mL in acetonitrile   |

|                                                                                                                                                                                                                                                                                                                                                                                                                                                                                                                                        |  |  |
|----------------------------------------------------------------------------------------------------------------------------------------------------------------------------------------------------------------------------------------------------------------------------------------------------------------------------------------------------------------------------------------------------------------------------------------------------------------------------------------------------------------------------------------|--|--|
| flonicamid, fluopyram, hexythiazox, imazalil, imidacloprid, iasmolin, kresoxim-methyl, malathion, metalaxyl, methiocarb, methoprene, mevinphos, MGK-264, myclobutanil, naled, novaluron, oxamyl, paclobutrazol, phenothrin, phosmet, pirimicarb, prallethrin, propoxur, pyraclostrobin, pyrethrins, pyridaben, spinetoram, spinosad A, spinosad B, spiridiclofen, spiromesifin, spiroxamine, tebuconazole, tebufenozide, teflubenzuron, tetrachlorvinphos, tetramethrin, thiacloprid, thiametoxam, thiophanate-methyl, trifloxystrobin |  |  |
|----------------------------------------------------------------------------------------------------------------------------------------------------------------------------------------------------------------------------------------------------------------------------------------------------------------------------------------------------------------------------------------------------------------------------------------------------------------------------------------------------------------------------------------|--|--|

## Methods for the separation, identification and quantification of cannabinoids by LC–MS/MS

**Preparation of stock solutions, Internal Standard (ISTD) mixture, and calibration curve standards.** All chemicals were received as 1 mg/mL stock solutions in methanol. Isotope-labeled ISTD mixture was prepared by mixing and diluting individual stock solutions to a final concentration of 5 µg/mL for each ISTD using methanol. Ten-point calibration curves of analytes from 0.0625 to 12.5 µg/mL were prepared by mixing and diluting the stock solutions using methanol.

**LC-MS/MS Instrumentation and conditions.** An Agilent 1290 series UHPLC system (Palo Alto, CA, USA) coupled with an AB Sciex QTRAP® 5500 mass spectrometer (Concord, ON, USA) was used for all online LC-MS/MS analyses. The column used was a Waters ACQUITY UPLC BEH C18 column (2.1 mm x 75 mm, 1.7 µm particle size, 130 Å pore size). The controlling software for the sample analysis was Analyst® 1.7.2. The data analysis software was Analyst® 1.6.3.

The UHPLC parameters used to separate cannabinoids were as follows: solvent A was 0.2% (v/v) formic acid (FA) in water, and solvent B was 0.2% (v/v) FA in acetonitrile. The gradient profile for this UHPLC elution was as follows: t = 0.0 min, 50% A; t = 1.0 min, 50% A; t = 3.0 min, 95% A; t = 3.51 min, 50% A; and maintained at 50% A for another 5.0 min until the column pressure was stable for the next injection. The flow rate was set to 0.6 mL/min, and 10 µL of the final sample solution was injected for analysis. The column oven was set at 40 °C. The QTRAP® 5500 mass spectrometer was set to a positive electrospray ionization (ESI) mode with a scheduled multiple reaction monitoring (sMRM) scan for the quantification of THC, CBD, CBN, CBG, CBDV, CBC, THCV, and CBL (see Table S2 for definitions of abbreviations); and to a negative ESI mode with sMRM to quantify THC-COOH, THCA, CBNA, CBLA+CBCA, CBDVA, CBDA, and CBGA (see Table S2 for definitions of abbreviations). The IonSpray voltage was set at 5500 volts for positive mode and -4500 volts for negative mode; and the ion source temperature was set at 500 °C. The curtain gas (CUR), ion source gas 1 (GAS1), ion source gas 2 (GAS2) and collision gas (CAD) were set at 20, 40, 50 and medium, separately. The entrance potential (EP) was set to 15 volts, whereas the declustering potential (DP), collision energy (CE), collision cell exit potential (CXP), MRM precursor ion (Q1) and fragment ion (Q3) were optimized and set specifically for each analyte and isotope-labeled standard (ISTD).

## Methods for separation and quantification of polyphenols by UHPLC-MS.

**Preparation of stock solutions, Internal Standard (ISTD) mixture, and calibration curve standards.** All chemicals were weighed carefully on a Sartorius CPA225D semi-micro electronic balance (Mississauga, ON, CA) with a precision of 0.0001 g. Stock solutions were prepared by dissolving the accurately weighed chemicals in 80 % methanol (MeOH) with 0.1% FA (gallic acid monohydrate, 3-5-dihydroxybenzoic acid, vanillic acid, caffeic acid, p-coumaric acid, ferulic acid, piceol, pungenol), in 80% MeOH (protocatechuic aldehyde), in 100% MeOH (vanillin), in DMSO (apigenin), 100% ethanol (EtOH; (+)-catechin hydrate, gallic acid) and 100% EtOH with 0.1% FA (quercetin). Eight-point calibration curves of analytes (Calibrant (Cal) 1 to Cal 8) were devised from concentration ranges that are expected for plants (from 0.01-70 µM for apigenin, caffeic acid, p-coumaric acid, gallic acid, protocatechuic aldehyde and quercetin; from 1.13-250 µM for ferulic acid, gallic acid, piceol, vanillic acid and vanillin; from 3.13-900 µM for catechin, 3,4-dihydroxybenzoic acid and pungenol).

**LC-MS/MS Instrumentation and conditions.** A Thermo Scientific Vanquish UHPLC system (Waltham, MA, U.S.A.) and an Agilent (Santa Clara, CA, U.S.A.) reversed-phase Zorbax Eclipse XDB C18 column (3.0 mm x 100 mm, 3.5 µm particle size, 80 Å pore size) with an ACQUITY UPLC CSH C18 VanGuard Pre-column (2.1 mm x 5 mm, 1.7 µm particle size, 130 Å pore size) were used for all online UHPLC-HRMS analyses with a Thermo Scientific Q-Exactive HF Hybrid Quadrupole-Orbitrap Mass Spectrometer (Waltham, MA, U.S.A.). The controlling software for the sample analysis was Thermo Xcalibur 4.1.31.9.

The UHPLC parameters used for analysis were as follows: solvent A- 0.1% (v/v) FA in the water, and solvent B- 0.1% (v/v) FA in methanol. The gradient profile for this HPLC solvent run was as follows: t = 0 min, 1% B; t = 0.5 min, 1% B; t = 3.5 min, 60% B; t = 4.5 min 99% B; t = 5.7 min, 99% B; t = 5.71 min, 1% B; and finally maintained at 1% B for 2.3 min before the next injection. The column oven was set at 30 °C. The flow rate was 500 µL/min, and



the sample injection volume was 5  $\mu\text{L}$ . For HRMS analysis, both solvents A and B were introduced to a heated electrospray ionization (HESI-II) probe at 370 °C auxiliary gas heater temperature, 320 °C capillary temperature, and 2.70 kV spray voltage. Nitrogen gas was used as both auxiliary and sheath gas at a flow rate of 50 and 12 mL/min, respectively. Mass scan range was set to  $m/z$  70 to 1000 and resolution was set at 30,000 Full Width at Half Maximum (FWHM). Data acquisition was done using parallel reaction monitoring (PRM) in a negative ionization mode and analyte peak identification and integration were done by TraceFinder 4.1.

## Results

Table S3. Targeted GC-MS analysis of terpenoids in six cannabis cultivars.

| Terpenoid<br>(mg per g) | Cultivar   |                 |            |            |            |              |
|-------------------------|------------|-----------------|------------|------------|------------|--------------|
|                         | Alien Dawg | Tangerine Dream | Sensi Star | Quadra     | Gabriola   | Island Honey |
| Camphene                | 0.03±0.003 | 0.02±0.002      | 0.01±0.001 | 0.06±0.006 | 0.10±0.001 | ND           |
| β-Myrcene               | 1.17±0.02  | 1.71±0.01       | 0.75±0.008 | 0.38±0.004 | 0.42±0.004 | 0.44±0.004   |
| α-Phellandrene          | ND         | ND              | 0.10±0.001 | ND         | ND         | ND           |
| 3-Carene                | ND         | ND              | 0.10±0.001 | ND         | ND         | ND           |
| Eucalyptol              | ND         | ND              | 0.04±0.004 | ND         | ND         | ND           |
| Ocimene                 | ND         | ND              | 0.30±0.01  | 0.10±0.001 | 0.06±0.006 | ND           |
| (+)-Fenchone            | ND         | ND              | ND         | 0.02±0.002 | 0.10±0.001 | ND           |
| Linalool                | 0.11±0.01  | 0.29±0.003      | ND         | 0.89±0.01  | 0.70±0.01  | 0.19±0.002   |
| trans-Caryophyllene     | 1.86±0.01  | 0.85±0.009      | 0.78±0.008 | 1.02±0.01  | 2.37±0.02  | 1.32±0.009   |
| E- β-Farnesene          | 1.54±0.18  | 2.21±0.05       | ND         | 1.01±0.01  | 3.10±0.02  | ND           |
| (-)-Caryophyllene Oxide | 0.14±0.001 | 0.15±0.001      | 0.13±0.001 | 0.15±0.001 | 0.18±0.001 | 0.15±0.001   |
| (-)-α-Bisabolol         | 0.26±0.003 | 0.50±0.01       | 0.40±0.004 | 0.46±0.005 | 0.45±0.004 | 0.39±0.004   |
| α-Pinene                | 0.13±0.001 | 0.75±0.008      | 0.25±0.003 | 0.25±0.003 | 0.58±0.01  | 0.02±0.002   |
| Sabinene                | ND         | ND              | 0.05±0.006 | ND         | ND         | ND           |
| β-Pinene                | 0.12±0.00  | 0.27±0.003      | 0.16±0.001 | 0.25±0.003 | 0.55±0.01  | 0.04±0.004   |
| α-Terpinene             | ND         | ND              | 0.12±0.001 | ND         | ND         | ND           |
| R-(+)-Limonene          | 0.86±0.01  | 0.26±0.003      | 0.18±0.002 | 1.38±0.01  | 2.48±0.01  | 0.12±0.001   |
| γ-Terpinene             | ND         | ND              | 0.10±0.001 | ND         | ND         | ND           |
| Sabinene hydrate        | ND         | ND              | 0.05±0.006 | 0.02±0.002 | 0.03±0.003 | ND           |
| Terpinolene             | ND         | ND              | 1.89±0.03  | ND         | ND         | ND           |
| Fenchyl Alcohol         | 0.13±0.001 | 0.06±0.007      | 0.06±0.007 | 0.59±0.01  | 0.45±0.01  | 0.03±0.003   |
| Borneol                 | 0.09±0.01  | 0.07±0.007      | 0.08±0.008 | 0.27±0.01  | 0.13±0.001 | 0.07±0.007   |
| α-Terpineol             | 0.25±0.02  | 0.22±0.002      | 0.37±0.004 | 0.69±0.007 | 0.62±0.006 | 0.19±0.002   |
| α-Humulene              | 0.62±0.01  | 0.24±0.01       | 0.23±0.002 | 0.29±0.003 | 0.60±0.01  | 0.34±0.003   |
| trans-Nerolidol         | ND         | 1.09±0.009      | ND         | ND         | ND         | 1.10±0.009   |

|                        |            |            |            |            |            |             |
|------------------------|------------|------------|------------|------------|------------|-------------|
| Guaiol                 | ND         | 0.56±0.01  | 0.37±0.003 | ND         | ND         | ND          |
| Bulnesol               | ND         | 0.57±0.006 | 0.31±0.01  | ND         | ND         | ND          |
| β-Eudesmol             | ND         | 0.35±0.01  | 0.21±0.01  | ND         | ND         | ND          |
| cis-2-pinanol*         | 0.08±0.002 | 0.04±0.002 | 0.04±0.001 | 0.39±0.009 | 0.44±0.004 | 0.02±0.001  |
| trans-2-Pinanol*       | ND         | ND         | ND         | 0.03±0.001 | 0.06±0.001 | ND          |
| Camphene hydrate*      | ND         | ND         | ND         | 0.02±0.002 | 0.01±0.001 | ND          |
| A-Ylangene*            | 0.07±0.009 | 0.05±0.001 | ND         | 0.06±0.001 | 0.06±0.001 | ND          |
| α-Copaene*             | 0.05±0.009 | ND         | ND         | ND         | ND         | ND          |
| Selina-5,11-diene*     | 0.09±0.002 | ND         | 0.06±0.001 | 0.08±0.001 | 0.13±0.001 | 0.07±0.001  |
| γ-Elemene*             | ND         | ND         | ND         | ND         | 0.18±0.001 | 0.05±0.001  |
| trans α-Bergamotene*   | 0.28±0.001 | 0.29±0.001 | 0.16±0.001 | 0.19±0.001 | 0.32±0.001 | 0.14±0.001  |
| α-Guaiene*             | ND         | ND         | 0.13±0.002 | 0.18±0.001 | ND         | ND          |
| γ-Murolene*            | 0.11±0.006 | ND         | 0.06±0.001 | 0.08±0.001 | 0.15±0.001 | 0.07±0.0001 |
| β-Selinene*            | 0.23±0.001 | 0.08±0.001 | 0.11±0.003 | 0.21±0.001 | 0.34±0.006 | 0.19±0.001  |
| α-Selinene*            | 0.27±0.004 | ND         | 0.12±0.001 | 0.24±0.001 | 0.35±0.004 | 0.18±0.001  |
| Δ-Cadinene*            | 0.10±0.005 | ND         | ND         | ND         | ND         | ND          |
| β-Bisabolene*          | ND         | 0.18±0.001 | ND         | ND         | ND         | ND          |
| Eudesma-3,7(11)-diene* | 1.32±0.002 | ND         | 0.39±0.003 | 0.77±0.007 | 1.58±0.007 | 0.59±0.011  |
| α-Eudesmol*            | ND         | 0.40±0.023 | 0.24±0.003 | ND         | ND         | ND          |
| Juniper camphor*       | 0.13±0.007 | 0.07±0.005 | ND         | 0.09±0.001 | 0.14±0.001 | 0.06±0.006  |

Abbreviations: ND – not detected.

Table S4. Untargeted GC-MS analysis of terpenoids and volatile compounds.

| RT (min) | Cultivar               | Compound name                | RI (experimental) | RI (Theoretical) | RI Relative variance |
|----------|------------------------|------------------------------|-------------------|------------------|----------------------|
| 5.322    | <b>Alkane standard</b> | <b>n-Nonane</b>              | <b>NA</b>         | <b>NA</b>        | <b>NA</b>            |
| 5.424    | Island Honey           | 3-Methylcyclopentyl acetate  | 902               | 988              | -8.66                |
| 5.793    | Sensi Star             | Dimethylaminoethanol acetate | 911               | 834              | 9.27                 |
| 6.149    | Sensi Star             | Ethyl dimethylacrylate       | 920               | 869              | 5.85                 |
| 6.245    | Sensi Star             | beta-Thujene                 | 922               | 873              | 5.63                 |
| 6.480    | Alien Dawg             | alpha-Pinene                 | 928               | 948              | -2.14                |
| 6.480    | Tangerine Dream        | alpha-Pinene                 | 928               | 948              | -2.14                |
| 6.480    | Sensi Star             | alpha-Pinene                 | 928               | 948              | -2.14                |
| 6.480    | Quadra                 | alpha-Pinene                 | 928               | 948              | -2.14                |
| 6.480    | Gabriola               | alpha-Pinene                 | 928               | 948              | -2.14                |
| 6.486    | Island Honey           | alpha-Pinene                 | 928               | 948              | -2.12                |
| 7.034    | Gabriola               | Camphene                     | 941               | 943              | -0.21                |
| 7.040    | Alien Dawg             | Camphene                     | 941               | 943              | -0.20                |
| 7.040    | Tangerine Dream        | Camphene                     | 941               | 943              | -0.20                |
| 7.040    | Sensi Star             | Camphene                     | 941               | 943              | -0.20                |
| 7.040    | Quadra                 | Camphene                     | 941               | 943              | -0.20                |
| 7.040    | Island Honey           | Camphene                     | 941               | 943              | -0.20                |
| 8.147    | Sensi Star             | Sabinene                     | 968               | 897              | 7.88                 |
| 8.255    | Alien Dawg             | beta-Pinene                  | 970               | 943              | 2.89                 |
| 8.255    | Tangerine Dream        | beta-Pinene                  | 970               | 943              | 2.89                 |
| 8.255    | Sensi Star             | beta-Pinene                  | 970               | 943              | 2.89                 |
| 8.255    | Quadra                 | beta-Pinene                  | 970               | 943              | 2.89                 |
| 8.261    | Gabriola               | beta-Pinene                  | 970               | 943              | 2.91                 |
| 8.261    | Island Honey           | beta-Pinene                  | 970               | 943              | 2.91                 |
| 8.790    | Sensi Star             | 3-Methyl-3-cyclohexen-1-one  | 983               | 962              | 2.19                 |
| 9.044    | Sensi Star             | beta-Myrcene                 | 989               | 958              | 3.25                 |
| 9.050    | Alien Dawg             | beta-Myrcene                 | 989               | 958              | 3.27                 |
| 9.050    | Tangerine Dream        | beta-Myrcene                 | 989               | 958              | 3.27                 |
| 9.050    | Quadra                 | beta-Myrcene                 | 989               | 958              | 3.27                 |
| 9.050    | Gabriola               | beta-Myrcene                 | 989               | 958              | 3.27                 |
| 9.050    | Island Honey           | beta-Myrcene                 | 989               | 958              | 3.27                 |
| 9.496    | <b>Alkane standard</b> | <b>n-Decane</b>              | <b>NA</b>         | <b>NA</b>        | <b>NA</b>            |
| 9.757    | Sensi Star             | alpha-Phellandrene           | 1003              | 969              | 3.56                 |
| 10.094   | Sensi Star             | 3-Carene                     | 1008              | 948              | 6.32                 |
| 10.539   | Sensi Star             | alpha-Terpinene              | 1014              | 998              | 1.59                 |
| 11.074   | Sensi Star             | o-Cymene                     | 1021              | 1042             | -2.02                |
| 11.334   | Tangerine Dream        | Limonene                     | 1024              | 1018             | 0.62                 |

Table S4. Continued

| RT (min) | Cultivar               | Compound name                               | RI (experimental) | RI (Theoretical) | RI Relative variance |
|----------|------------------------|---------------------------------------------|-------------------|------------------|----------------------|
| 11.334   | Island Honey           | Limonene                                    | 1024              | 1018             | 0.62                 |
| 11.341   | Sensi Star             | Limonene                                    | 1024              | 1018             | 0.63                 |
| 11.347   | Alien Dawg             | Limonene                                    | 1025              | 1018             | 0.64                 |
| 11.366   | Quadra                 | Limonene                                    | 1025              | 1018             | 0.67                 |
| 11.404   | Gabriola               | Limonene                                    | 1025              | 1018             | 0.72                 |
| 11.500   | Sensi Star             | Eucalyptol                                  | 1027              | 1059             | -3.06                |
| 11.519   | Gabriola               | Eucalyptol                                  | 1027              | 1059             | -3.04                |
| 12.957   | Sensi Star             | beta-Ocimene                                | 1046              | 976              | 7.16                 |
| 12.957   | Quadra                 | beta-Ocimene                                | 1046              | 976              | 7.16                 |
| 12.957   | Gabriola               | beta-Ocimene                                | 1046              | 976              | 7.16                 |
| 13.650   | Sensi Star             | gamma-Terpinene                             | 1055              | 998              | 5.72                 |
| 14.254   | Gabriola               | trans-Sabinene hydrate                      | 1063              | 1041             | 2.12                 |
| 14.255   | Sensi Star             | trans-Sabinene hydrate                      | 1063              | 1041             | 2.12                 |
| 15.832   | Gabriola               | Fenchone                                    | 1084              | 1121             | -3.30                |
| 15.845   | Quadra                 | Fenchone                                    | 1084              | 1121             | -3.29                |
| 15.947   | Sensi Star             | Terpinolene                                 | 1086              | 1052             | 3.18                 |
| 16.685   | Sensi Star             | cis-beta-Terpineol                          | 1095              | 1158             | -5.42                |
| 17.041   | <b>Alkane standard</b> | <b>n-Undecane</b>                           | <b>NA</b>         | <b>NA</b>        | <b>NA</b>            |
| 17.041   | Alien Dawg             | Linalool                                    | 1100              | 1082             | 1.66                 |
| 17.041   | Tangerine Dream        | Linalool                                    | 1100              | 1082             | 1.66                 |
| 17.041   | Island Honey           | Linalool                                    | 1100              | 1082             | 1.66                 |
| 17.060   | Sensi Star             | Linalool                                    | 1100              | 1082             | 1.68                 |
| 17.066   | Gabriola               | Linalool                                    | 1100              | 1082             | 1.69                 |
| 17.073   | Quadra                 | Linalool                                    | 1100              | 1082             | 1.70                 |
| 17.811   | Alien Dawg             | Fenchyl Alcohol                             | 1109              | 1138             | -2.51                |
| 17.824   | Tangerine Dream        | Fenchyl Alcohol                             | 1110              | 1138             | -2.49                |
| 17.824   | Sensi Star             | Fenchyl Alcohol                             | 1110              | 1138             | -2.49                |
| 17.830   | Island Honey           | Fenchyl Alcohol                             | 1110              | 1138             | -2.49                |
| 17.836   | Gabriola               | Fenchyl Alcohol                             | 1110              | 1138             | -2.48                |
| 17.843   | Quadra                 | Fenchyl Alcohol                             | 1110              | 1138             | -2.47                |
| 18.390   | Alien Dawg             | Bicyclo[3.1.1]heptan-2-ol, 2,6,6-trimethyl- | 1117              | 1088             | 2.63                 |
| 18.396   | Tangerine Dream        | Bicyclo[3.1.1]heptan-2-ol, 2,6,6-trimethyl- | 1117              | 1088             | 2.64                 |
| 18.396   | Sensi Star             | Bicyclo[3.1.1]heptan-2-ol, 2,6,6-trimethyl- | 1117              | 1088             | 2.64                 |
| 18.396   | Island Honey           | Bicyclo[3.1.1]heptan-2-ol, 2,6,6-trimethyl- | 1117              | 1088             | 2.64                 |

Table S4. Continued

| RT (min) | Cultivar               | Compound name                                         | RI (experimental) | RI (Theoretical) | RI Relative variance |
|----------|------------------------|-------------------------------------------------------|-------------------|------------------|----------------------|
| 18.403   | Quadra                 | Bicyclo[3.1.1]heptan-2-ol, 2,6,6-trimethyl-           | 1117              | 1088             | 2.65                 |
| 18.415   | Gabriola               | Bicyclo[3.1.1]heptan-2-ol, 2,6,6-trimethyl-           | 1117              | 1088             | 2.66                 |
| 19.987   | Quadra                 | trans-2-Pinanol                                       | 1136              | 1088             | 4.44                 |
| 19.987   | Gabriola               | trans-2-Pinanol                                       | 1136              | 1088             | 4.44                 |
| 19.993   | Alien Dawg             | trans-2-Pinanol                                       | 1136              | 1088             | 4.44                 |
| 20.012   | Sensi Star             | cis-2-Menthenol                                       | 1137              | 1109             | 2.49                 |
| 20.451   | Quadra                 | Camphene hydrate                                      | 1142              | 1088             | 4.96                 |
| 20.451   | Gabriola               | Camphene hydrate                                      | 1142              | 1088             | 4.96                 |
| 20.458   | Alien Dawg             | Camphene hydrate                                      | 1142              | 1088             | 4.97                 |
| 20.534   | Sensi Star             | 3-Oxabicyclo[4.3.0]non-8-en-2-one, cis-               | 1143              | 1189             | -3.87                |
| 20.814   | Alien Dawg             | Tetrahydrofuran                                       | 1146              | 1108             | 3.47                 |
| 21.946   | Alien Dawg             | Borneol                                               | 1160              | 1138             | 1.97                 |
| 21.953   | Quadra                 | Borneol                                               | 1161              | 1138             | 1.98                 |
| 21.953   | Gabriola               | Borneol                                               | 1161              | 1138             | 1.98                 |
| 21.972   | Tangerine Dream        | Borneol                                               | 1161              | 1138             | 2.00                 |
| 21.972   | Sensi Star             | Borneol                                               | 1161              | 1138             | 2.00                 |
| 21.984   | Island Honey           | Borneol                                               | 1161              | 1138             | 2.01                 |
| 22.952   | Quadra                 | Terpinen-4-ol                                         | 1173              | 1137             | 3.15                 |
| 22.958   | Sensi Star             | 2-Isopropenyl-5-methylhex-4-enal                      | 1173              | 1092             | 7.41                 |
| 23.760   | Sensi Star             | p-Cymene-8-ol                                         | 1183              | 1197             | -1.19                |
| 24.084   | Alien Dawg             | alpha-Terpineol                                       | 1187              | 1143             | 3.83                 |
| 24.084   | Tangerine Dream        | alpha-Terpineol                                       | 1187              | 1143             | 3.83                 |
| 24.084   | Sensi Star             | alpha-Terpineol                                       | 1187              | 1143             | 3.83                 |
| 24.103   | Quadra                 | alpha-Terpineol                                       | 1187              | 1143             | 3.85                 |
| 24.103   | Gabriola               | alpha-Terpineol                                       | 1187              | 1143             | 3.85                 |
| 24.109   | Island Honey           | alpha-Terpineol                                       | 1187              | 1143             | 3.86                 |
| 24.682   | Tangerine Dream        | Hexyl butyrate                                        | 1194              | 1183             | 0.94                 |
| 24.707   | Alien Dawg             | Hexyl butyrate                                        | 1194              | 1183             | 0.97                 |
| 25.159   | <b>Alkane standard</b> | <b>n-Dodecane</b>                                     | <b>NA</b>         | <b>NA</b>        | <b>NA</b>            |
| 26.591   | Sensi Star             | (+)-cis-Verbenol, acetate                             | 1231              | 1276             | -3.54                |
| 28.983   | Quadra                 | 2,6-Dimethyl-1,7-octadien-3,6-diol                    | 1282              | 1227             | 4.52                 |
| 29.174   | Sensi Star             | 5-Isopropenyl-2-methyl-7-oxabicyclo[4.1.0]heptan-2-ol | 1287              | 1169             | 10.06                |
| 29.269   | Alien Dawg             | Bornyl acetate                                        | 1289              | 1277             | 0.91                 |

Table S4. Continued

| RT (min) | Cultivar               | Compound name              | RI (experimental) | RI (Theoretical) | RI Relative variance |
|----------|------------------------|----------------------------|-------------------|------------------|----------------------|
| 29.269   | Quadra                 | (-)-Bornyl acetate         | 1289              | 1277             | 0.91                 |
| 29.269   | Gabriola               | (-)-Bornyl acetate         | 1289              | 1277             | 0.91                 |
| 29.797   | <b>Alkane standard</b> | <b>n-Tridecane</b>         | <b>NA</b>         | <b>NA</b>        | <b>NA</b>            |
| 30.847   | Quadra                 | Limonene glycol            | 1344              | 1346             | -0.18                |
| 31.559   | Tangerine Dream        | alpha-Ylangene             | 1373              | 1221             | 12.46                |
| 31.559   | Gabriola               | alpha-Ylangene             | 1373              | 1221             | 12.46                |
| 31.559   | Island Honey           | alpha-Ylangene             | 1373              | 1221             | 12.46                |
| 31.566   | Alien Dawg             | alpha-Ylangene             | 1373              | 1221             | 12.48                |
| 31.661   | Island Honey           | Germacrene D               | 1377              | 1515             | -9.09                |
| 31.667   | Alien Dawg             | alpha-Copaene              | 1378              | 1221             | 12.82                |
| 31.909   | Alien Dawg             | beta-Cubebene              | 1388              | 1339             | 3.63                 |
| 31.954   | Gabriola               | Hexyl hexanoate            | 1389              | 1381             | 0.61                 |
| 31.960   | Tangerine Dream        | Hexyl hexanoate            | 1390              | 1381             | 0.63                 |
| 32.017   | Tangerine Dream        | cis-sesquisabinene hydrate | 1392              | 1523             | -8.60                |
| 32.030   | Quadra                 | Selina-5,11-diene          | 1393              | 1474             | -5.52                |
| 32.030   | Gabriola               | Selina-5,11-diene          | 1393              | 1474             | -5.52                |
| 32.030   | Island Honey           | Selina-5,11-diene          | 1393              | 1474             | -5.52                |
| 32.036   | Alien Dawg             | Selina-5,11-diene          | 1393              | 1474             | -5.50                |
| 32.037   | Sensi Star             | Selina-5,11-diene          | 1393              | 1474             | -5.50                |
| 32.208   | <b>Alkane standard</b> | <b>n-Tetradecane</b>       | <b>NA</b>         | <b>NA</b>        | <b>NA</b>            |
| 32.335   | Tangerine Dream        | trans-alpha-Bergamotene    | 1407              | 1430             | -1.60                |
| 32.336   | Quadra                 | trans-alpha-Bergamotene    | 1407              | 1430             | -1.60                |
| 32.342   | Alien Dawg             | trans-alpha-Bergamotene    | 1407              | 1430             | -1.58                |
| 32.342   | Gabriola               | trans-alpha-Bergamotene    | 1407              | 1430             | -1.58                |
| 32.52    | Alien Dawg             | alpha-Bergamotene          | 1417              | 1430             | -0.89                |
| 32.52    | Tangerine Dream        | alpha-Bergamotene          | 1417              | 1430             | -0.89                |
| 32.52    | Quadra                 | alpha-Bergamotene          | 1417              | 1430             | -0.89                |
| 32.52    | Gabriola               | alpha-Bergamotene          | 1417              | 1430             | -0.89                |
| 32.596   | Tangerine Dream        | trans-Caryophyllene        | 1422              | 1494             | -4.85                |
| 32.596   | Sensi Star             | trans-Caryophyllene        | 1422              | 1494             | -4.85                |
| 32.603   | Quadra                 | trans-Caryophyllene        | 1422              | 1494             | -4.82                |
| 32.609   | Alien Dawg             | trans-Caryophyllene        | 1422              | 1494             | -4.80                |
| 32.609   | Island Honey           | trans-Caryophyllene        | 1422              | 1494             | -4.80                |
| 32.615   | Gabriola               | trans-Caryophyllene        | 1423              | 1494             | -4.78                |
| 32.692   | Alien Dawg             | 1H-Cycloprop[e]azulene     | 1427              | 1386             | 2.95                 |
| 32.876   | Gabriola               | gamma-Elemene              | 1437              | 1431             | 0.43                 |
| 32.876   | Island Honey           | gamma-Elemene              | 1437              | 1431             | 0.43                 |
| 32.914   | Tangerine Dream        | alpha-Bergamotene          | 1437              | 1430             | 0.64                 |

Table S4. Continued

| RT (min) | Cultivar        | Compound name                                                     | RI (experimental) | RI (Theoretical) | RI Relative variance |
|----------|-----------------|-------------------------------------------------------------------|-------------------|------------------|----------------------|
| 32.915   | Sensi Star      | alpha-Bergamotene                                                 | 1439              | 1430             | 0.65                 |
| 32.921   | Alien Dawg      | alpha-Bergamotene                                                 | 1440              | 1430             | 0.67                 |
| 32.921   | Quadra          | alpha-Bergamotene                                                 | 1440              | 1430             | 0.67                 |
| 32.921   | Gabriola        | alpha-Bergamotene                                                 | 1440              | 1430             | 0.67                 |
| 32.921   | Island Honey    | alpha-Bergamotene                                                 | 1440              | 1430             | 0.67                 |
| 32.972   | Sensi Star      | alpha-Guaiene                                                     | 1442              | 1490             | -3.19                |
| 32.972   | Quadra          | alpha-Guaiene                                                     | 1442              | 1490             | -3.19                |
| 33.252   | Tangerine Dream | alpha-Humulene                                                    | 1458              | 1579             | -7.67                |
| 33.252   | Sensi Star      | alpha-Humulene                                                    | 1458              | 1579             | -7.67                |
| 33.258   | Quadra          | alpha-Humulene                                                    | 1458              | 1579             | -7.64                |
| 33.258   | Island Honey    | alpha-Humulene                                                    | 1458              | 1579             | -7.64                |
| 33.264   | Alien Dawg      | alpha-Humulene                                                    | 1459              | 1579             | -7.62                |
| 33.264   | Gabriola        | alpha-Humulene                                                    | 1459              | 1579             | -7.62                |
| 33.296   | Tangerine Dream | cis-beta-Farnesene                                                | 1460              | 1440             | 1.42                 |
| 33.296   | Quadra          | cis-beta-Farnesene                                                | 1460              | 1440             | 1.42                 |
| 33.302   | Gabriola        | cis-beta-Farnesene                                                | 1461              | 1440             | 1.44                 |
| 33.303   | Alien Dawg      | cis-beta-Farnesene                                                | 1461              | 1440             | 1.44                 |
| 33.665   | Sensi Star      | gamma-Murolene                                                    | 1481              | 1435             | 3.20                 |
| 33.671   | Gabriola        | gamma-Murolene                                                    | 1481              | 1435             | 3.22                 |
| 33.672   | Alien Dawg      | gamma-Murolene                                                    | 1481              | 1435             | 3.23                 |
| 33.672   | Island Honey    | gamma-Murolene                                                    | 1481              | 1435             | 3.23                 |
| 33.799   | Alien Dawg      | 2-Isopropenyl-4a,8-dimethyl-1,2,3,4,4a,5,6,7-octahydronaphthalene | 1488              | 1502             | -0.91                |
| 33.799   | Tangerine Dream | 2-Isopropenyl-4a,8-dimethyl-1,2,3,4,4a,5,6,7-octahydronaphthalene | 1488              | 1502             | -0.91                |
| 33.799   | Quadra          | 2-Isopropenyl-4a,8-dimethyl-1,2,3,4,4a,5,6,7-octahydronaphthalene | 1488              | 1502             | -0.91                |
| 33.799   | Island Honey    | 2-Isopropenyl-4a,8-dimethyl-1,2,3,4,4a,5,6,7-octahydronaphthalene | 1488              | 1502             | -0.91                |
| 33.805   | Gabriola        | 2-Isopropenyl-4a,8-dimethyl-1,2,3,4,4a,5,6,7-octahydronaphthalene | 1489              | 1502             | -0.89                |
| 33.843   | Tangerine Dream | beta-Selinene                                                     | 1491              | 1474             | 1.14                 |
| 33.85    | Alien Dawg      | beta-Selinene                                                     | 1491              | 1474             | 1.16                 |
| 33.85    | Sensi Star      | beta-Selinene                                                     | 1491              | 1474             | 1.16                 |
| 33.85    | Quadra          | beta-Selinene                                                     | 1491              | 1474             | 1.16                 |



Table S4. Continued

| RT (min) | Cultivar               | Compound name                                                            | RI (experimental) | RI (Theoretical) | RI Relative variance |
|----------|------------------------|--------------------------------------------------------------------------|-------------------|------------------|----------------------|
| 33.85    | Gabriola               | beta-Selinene                                                            | 1491              | 1474             | 1.16                 |
| 33.85    | Island Honey           | beta-Selinene                                                            | 1491              | 1474             | 1.16                 |
| 34.002   | Alien Dawg             | alpha-Selinene                                                           | 1500              | 1474             | 1.74                 |
| 34.002   | Sensi Star             | alpha-Selinene                                                           | 1500              | 1474             | 1.74                 |
| 34.002   | Quadra                 | alpha-Selinene                                                           | 1500              | 1474             | 1.74                 |
| 34.002   | Gabriola               | alpha-Selinene                                                           | 1500              | 1474             | 1.74                 |
| 34.002   | Island Honey           | alpha-Selinene                                                           | 1500              | 1474             | 1.74                 |
| 34.009   | <b>Alkane standard</b> | <b>n-Pentadecane</b>                                                     | <b>NA</b>         | <b>NA</b>        | <b>NA</b>            |
| 34.098   | Tangerine Dream        | Dihydroagarofuran                                                        | 1505              | 1514             | -0.60                |
| 34.174   | Sensi Star             | alpha-Bulnesene                                                          | 1511              | 1490             | 1.40                 |
| 34.18    | Island Honey           | alpha-trans-Farnesene                                                    | 1511              | 1458             | 3.66                 |
| 34.181   | Quadra                 | alpha-Bulnesene                                                          | 1511              | 1490             | 1.43                 |
| 34.187   | Gabriola               | alpha-trans-Farnesene                                                    | 1512              | 1458             | 3.69                 |
| 34.2     | Alien Dawg             | delta-Cadinene                                                           | 1513              | 1469             | 2.97                 |
| 34.2     | Tangerine Dream        | beta-Bisabolene                                                          | 1513              | 1500             | 0.84                 |
| 34.378   | Alien Dawg             | gamma-Gurjunene                                                          | 1524              | 1461             | 4.34                 |
| 34.378   | Tangerine Dream        | gamma-Gurjunene                                                          | 1524              | 1461             | 4.34                 |
| 34.378   | Sensi Star             | gamma-Gurjunene                                                          | 1524              | 1461             | 4.34                 |
| 34.378   | Island Honey           | gamma-Gurjunene                                                          | 1524              | 1461             | 4.34                 |
| 34.422   | Sensi Star             | alpha-Gurjunene                                                          | 1527              | 1419             | 7.63                 |
| 34.429   | Alien Dawg             | alpha-Gurjunene                                                          | 1528              | 1419             | 7.66                 |
| 34.429   | Island Honey           | alpha-Gurjunene                                                          | 1528              | 1419             | 7.66                 |
| 34.499   | Alien Dawg             | alpha-Gurjunene                                                          | 1532              | 1419             | 7.99                 |
| 34.499   | Sensi Star             | alpha-Gurjunene                                                          | 1532              | 1419             | 7.99                 |
| 34.499   | Island Honey           | alpha-Gurjunene                                                          | 1532              | 1419             | 7.99                 |
| 34.658   | Sensi Star             | (4aR,8aS)-4a-Methyl-1-methylene-7-(propan-2-ylidene)decahydronaphthalene | 1543              | 1502             | 2.72                 |
| 34.664   | Quadra                 | (4aR,8aS)-4a-Methyl-1-methylene-7-(propan-2-ylidene)decahydronaphthalene | 1543              | 1502             | 2.75                 |
| 34.67    | Alien Dawg             | (4aR,8aS)-4a-Methyl-1-methylene-7-(propan-2-ylidene)decahydronaphthalene | 1544              | 1502             | 2.77                 |
| 34.67    | Island Honey           | (4aR,8aS)-4a-Methyl-1-methylene-7-(propan-2-ylidene)decahydronaphthalene | 1544              | 1502             | 2.77                 |
| 34.689   | Tangerine Dream        | beta-Maaliene                                                            | 1545              | 1432             | 7.89                 |

Table S4. Continued

| RT (min) | Cultivar               | Compound name         | RI (experimental) | RI (Theoretical) | RI Relative variance |
|----------|------------------------|-----------------------|-------------------|------------------|----------------------|
| 34.702   | Alien Dawg             | beta-Maaliene         | 1546              | 1432             | 7.95                 |
| 34.734   | Tangerine Dream        | cis-alpha-Bisabolene  | 1548              | 1518             | 1.97                 |
| 34.735   | Gabriola               | Eudesma-3,7(11)-diene | 1548              | 1507             | 2.72                 |
| 34.766   | Sensi Star             | Eudesma-3,7(11)-diene | 1550              | 1507             | 2.85                 |
| 34.772   | Quadra                 | Eudesma-3,7(11)-diene | 1550              | 1507             | 2.88                 |
| 34.772   | Island Honey           | Eudesma-3,7(11)-diene | 1550              | 1507             | 2.88                 |
| 34.785   | Alien Dawg             | Eudesma-3,7(11)-diene | 1551              | 1507             | 2.94                 |
| 35.02    | Gabriola               | Germacrene B          | 1567              | 1603             | -2.26                |
| 35.046   | Tangerine Dream        | trans-Nerolidol       | 1568              | 1564             | 0.29                 |
| 35.046   | Sensi Star             | trans-Nerolidol       | 1568              | 1564             | 0.29                 |
| 35.09    | Alien Dawg             | beta-Maaliene         | 1571              | 1432             | 9.73                 |
| 35.421   | Alien Dawg             | Caryophyllene oxide   | 1593              | 1507             | 5.72                 |
| 35.421   | Tangerine Dream        | Caryophyllene oxide   | 1593              | 1507             | 5.72                 |
| 35.421   | Sensi Star             | Caryophyllene oxide   | 1593              | 1507             | 5.72                 |
| 35.421   | Quadra                 | Caryophyllene oxide   | 1593              | 1507             | 5.72                 |
| 35.421   | Gabriola               | Caryophyllene oxide   | 1593              | 1507             | 5.72                 |
| 35.421   | Island Honey           | Caryophyllene oxide   | 1593              | 1507             | 5.72                 |
| 35.523   | <b>Alkane standard</b> | <b>n-Hexadecane</b>   | <b>NA</b>         | <b>NA</b>        | <b>NA</b>            |
| 35.606   | Sensi Star             | Guaiol                | 1606              | 1614             | -0.49                |
| 35.612   | Tangerine Dream        | Guaiol                | 1607              | 1614             | -0.46                |
| 35.733   | Tangerine Dream        | alpha-Eudesmol        | 1616              | 1598             | 1.10                 |
| 35.803   | Tangerine Dream        | Humulene-1,2-epoxide  | 1621              | 1592             | 1.81                 |
| 35.936   | Alien Dawg             | Selina-6-en-4-ol      | 1631              | 1593             | 2.36                 |
| 35.956   | Sensi Star             | gamma-Eudesmol        | 1632              | 1626             | 0.38                 |
| 35.962   | Tangerine Dream        | gamma-Eudesmol        | 1633              | 1626             | 0.40                 |
| 36.102   | Tangerine Dream        | gamma-Eudesmol        | 1643              | 1626             | 1.04                 |
| 36.382   | Tangerine Dream        | beta-Eudesmol         | 1664              | 1593             | 4.44                 |
| 36.382   | Sensi Star             | beta-Eudesmol         | 1664              | 1593             | 4.44                 |
| 36.401   | Alien Dawg             | Isovalencenol         | 1665              | 1745             | -4.58                |
| 36.407   | Gabriola               | Isovalencenol         | 1666              | 1750             | -4.83                |
| 36.414   | Quadra                 | beta-Guaiene          | 1666              | 1523             | 9.39                 |
| 36.42    | Tangerine Dream        | alpha-Eudesmol        | 1666              | 1598             | 4.29                 |
| 36.42    | Sensi Star             | alpha-Eudesmol        | 1666              | 1598             | 4.29                 |
| 36.592   | Tangerine Dream        | Bulnesol              | 1679              | 1614             | 4.04                 |
| 36.598   | Sensi Star             | Bulnesol              | 1680              | 1614             | 4.07                 |
| 36.766   | Tangerine Dream        | alpha-Bisabolol       | 1692              | 1625             | 4.13                 |
| 36.77    | Quadra                 | alpha-Bisabolol       | 1692              | 1625             | 4.15                 |
| 36.77    | Gabriola               | alpha-Bisabolol       | 1692              | 1625             | 4.15                 |

Table S4. Continued

| RT (min) | Cultivar               | Compound name                                           | RI (experimental) | RI (Theoretical) | RI Relative variance |
|----------|------------------------|---------------------------------------------------------|-------------------|------------------|----------------------|
| 36.77    | Island Honey           | alpha-Bisabolol                                         | 1692              | 1625             | 4.15                 |
| 36.776   | Sensi Star             | alpha-Bisabolol                                         | 1693              | 1625             | 4.18                 |
| 36.872   | <b>Alkane standard</b> | <b>n-Heptadecane</b>                                    | <b>NA</b>         | <b>NA</b>        | <b>NA</b>            |
| 36.999   | Quadra                 | Juniper camphor                                         | 1710              | 1647             | 3.84                 |
| 36.999   | Gabriola               | Juniper camphor                                         | 1710              | 1647             | 3.84                 |
| 37.005   | Alien Dawg             | Juniper camphor                                         | 1711              | 1647             | 3.87                 |
| 37.005   | Tangerine Dream        | Juniper camphor                                         | 1711              | 1647             | 3.87                 |
| 37.005   | Sensi Star             | Juniper camphor                                         | 1711              | 1647             | 3.87                 |
| 37.005   | Island Honey           | Juniper camphor                                         | 1711              | 1647             | 3.87                 |
| 37.164   | Gabriola               | Pentanoic acid, 4-methyl-, 3,7-dimethyl-6-octenyl ester | 1724              | 1636             | 5.35                 |
| 37.253   | Gabriola               | Isoaromadendrene epoxide                                | 1731              | 1281             | 35.11                |
| 37.26    | Island Honey           | Isospathulenol                                          | 1731              | 1569             | 10.34                |
| 37.59    | Gabriola               | Geranyl caproate                                        | 1758              | 1749             | 0.51                 |
| 38.112   | <b>Alkane standard</b> | <b>n-Octadecane</b>                                     | <b>NA</b>         | <b>NA</b>        | <b>NA</b>            |
| 38.316   | Sensi Star             | Selina-4,7-diol                                         | 1818              | 1738             | 4.57                 |
| 38.59    | Quadra                 | 3,7,11,15-Tetramethyl-2-hexadecen-1-ol                  | 1841              | 2045             | -9.97                |
| 38.596   | Sensi Star             | 3,7,11,15-Tetramethyl-2-hexadecen-1-ol                  | 1842              | 2045             | -9.95                |
| 38.596   | Gabriola               | 3,7,11,15-Tetramethyl-2-hexadecen-1-ol                  | 1842              | 2045             | -9.95                |
| 38.596   | Island Honey           | 3,7,11,15-Tetramethyl-2-hexadecen-1-ol                  | 1842              | 2045             | -9.95                |
| 38.602   | Alien Dawg             | 3,7,11,15-Tetramethyl-2-hexadecen-1-ol                  | 1842              | 2045             | -9.92                |
| 38.672   | Quadra                 | Hexahydrofarnesyl acetone                               | 1848              | 1754             | 5.36                 |
| 38.678   | Gabriola               | Hexahydrofarnesyl acetone                               | 1849              | 1754             | 5.39                 |
| 38.678   | Island Honey           | Hexahydrofarnesyl acetone                               | 1849              | 1754             | 5.39                 |
| 38.679   | Sensi Star             | Hexahydrofarnesyl acetone                               | 1849              | 1754             | 5.40                 |
| 38.685   | Alien Dawg             | Hexahydrofarnesyl acetone                               | 1849              | 1754             | 5.43                 |
| 38.774   | Gabriola               | 8-Hydroxyageraphorone                                   | 1857              | 1789             | 3.79                 |
| 39.098   | Alien Dawg             | 3,7,11,15-Tetramethyl-2-hexadecen-1-ol                  | 1885              | 2045             | -7.84                |
| 39.098   | Island Honey           | 3,7,11,15-Tetramethyl-2-hexadecen-1-ol                  | 1885              | 2045             | -7.84                |
| 39.277   | <b>Alkane standard</b> | <b>n-Nonadecane</b>                                     | <b>NA</b>         | <b>NA</b>        | <b>NA</b>            |
| 39.576   | Quadra                 | Methyl hexadecanoate                                    | 1927              | 1814             | 6.23                 |
| 39.582   | Sensi Star             | Methyl hexadecanoate                                    | 1928              | 1814             | 6.26                 |
| 39.582   | Gabriola               | Methyl hexadecanoate                                    | 1928              | 1814             | 6.26                 |

Table S4. Continued

| RT (min) | Cultivar               | Compound name                                          | RI (experimental) | RI (Theoretical) | RI Relative variance |
|----------|------------------------|--------------------------------------------------------|-------------------|------------------|----------------------|
| 39.582   | Island Honey           | Methyl hexadecanoate                                   | 1928              | 1814             | 6.26                 |
| 39.588   | Alien Dawg             | Methyl hexadecanoate                                   | 1928              | 1814             | 6.29                 |
| 39.588   | Tangerine Dream        | Methyl hexadecanoate                                   | 1928              | 1878             | 2.67                 |
| 39.976   | Island Honey           | Palmitic acid                                          | 1963              | 1968             | -0.25                |
| 39.983   | Tangerine Dream        | Palmitic acid                                          | 1964              | 1968             | -0.21                |
| 39.983   | Sensi Star             | Palmitic acid                                          | 1964              | 1968             | -0.21                |
| 39.983   | Quadra                 | Palmitic acid                                          | 1964              | 1968             | -0.21                |
| 40.384   | <b>Alkane standard</b> | <b>n-Icosane</b>                                       | <b>NA</b>         | <b>NA</b>        | <b>NA</b>            |
| 41.401   | Island Honey           | Methyl linoleate                                       | 2098              | 2093             | 0.22                 |
| 41.402   | Sensi Star             | Methyl linolelaidate                                   | 2098              | 2093             | 0.22                 |
| 41.402   | Quadra                 | Methyl linoleate                                       | 2098              | 2093             | 0.22                 |
| 41.408   | Alien Dawg             | Methyl linoleate                                       | 2098              | 2093             | 0.25                 |
| 41.408   | Tangerine Dream        | Methyl linolelaidate                                   | 2098              | 2093             | 0.25                 |
| 41.427   | <b>Alkane standard</b> | <b>n-Heneicosane</b>                                   | <b>NA</b>         | <b>NA</b>        | <b>NA</b>            |
| 41.471   | Island Honey           | Methyl linolenate                                      | 2104              | 2101             | 0.16                 |
| 41.478   | Alien Dawg             | Methyl linolenate                                      | 2105              | 2101             | 0.20                 |
| 41.478   | Sensi Star             | Methyl linolenate                                      | 2105              | 2101             | 0.20                 |
| 41.478   | Quadra                 | Methyl linolenate                                      | 2105              | 2101             | 0.20                 |
| 41.516   | Island Honey           | 10-Octadecenoic acid, methyl ester                     | 2109              | 2085             | 1.15                 |
| 41.643   | Island Honey           | Phytol                                                 | 2122              | 2045             | 3.75                 |
| 41.649   | Gabriola               | Phytol                                                 | 2122              | 2045             | 3.78                 |
| 41.847   | Alien Dawg             | Phytol                                                 | 2142              | 2045             | 4.75                 |
| 42.018   | Gabriola               | Murralongin                                            | 2159              | 2225             | -2.96                |
| 42.038   | Alien Dawg             | Furo[2,3-H]coumarine, 2-(1-hydroxyethyl)-1,6-dimethyl- | 2161              | 2242             | -3.61                |
| 42.426   | <b>Alkane standard</b> | <b>n-Docosane</b>                                      | <b>NA</b>         | <b>NA</b>        | <b>NA</b>            |
| 43.514   | Alien Dawg             | DELTA.8-Tetrahydrocannabinol                           | 2298              | 2475             | -7.14                |
| 43.514   | Tangerine Dream        | DELTA.8-Tetrahydrocannabinol                           | 2298              | 2475             | -7.14                |
| 43.514   | Sensi Star             | DELTA.8-Tetrahydrocannabinol                           | 2298              | 2475             | -7.14                |
| 43.514   | Quadra                 | DELTA.8-Tetrahydrocannabinol                           | 2298              | 2475             | -7.14                |
| 43.514   | Gabriola               | DELTA.8-Tetrahydrocannabinol                           | 2298              | 2475             | -7.14                |
| 43.514   | Island Honey           | DELTA.8-Tetrahydrocannabinol                           | 2298              | 2475             | -7.14                |
| 43.533   | <b>Alkane standard</b> | <b>n-Tricosane</b>                                     | <b>NA</b>         | <b>NA</b>        | <b>NA</b>            |
| 43.953   | Sensi Star             | DELTA 9-Tetrahydrocannabivarin                         | 2331              | 2276             | 2.44                 |
| 43.953   | Island Honey           | DELTA 9-Tetrahydrocannabivarin                         | 2331              | 2276             | 2.44                 |
| 43.959   | Quadra                 | DELTA 9-Tetrahydrocannabivarin                         | 2332              | 2276             | 2.46                 |
| 43.959   | Gabriola               | DELTA 9-Tetrahydrocannabivarin                         | 2332              | 2276             | 2.46                 |

Table S4. Continued

| RT (min) | Cultivar               | Compound name                             | RI (experimental) | RI (Theoretical) | RI Relative variance |
|----------|------------------------|-------------------------------------------|-------------------|------------------|----------------------|
| 43.965   | Tangerine Dream        | DELTA 9-Tetrahydrocannabivarin            | 2332              | 2276             | 2.48                 |
| 43.972   | Alien Dawg             | DELTA 9-Tetrahydrocannabivarin            | 2333              | 2276             | 2.50                 |
| 44.042   | Alien Dawg             | Oxymetazoline                             | 2338              | 2361             | -0.97                |
| 44.042   | Island Honey           | Oxymetazoline                             | 2338              | 2361             | -0.97                |
| 44.048   | Gabriola               | Oxymetazoline                             | 2339              | 2361             | -0.95                |
| 44.194   | Quadra                 | Cannabidiol                               | 2349              | 2605             | -9.81                |
| 44.194   | Island Honey           | Cannabidiol                               | 2349              | 2605             | -9.81                |
| 44.201   | Sensi Star             | Cannabidiol                               | 2350              | 2605             | -9.79                |
| 44.201   | Gabriola               | Cannabidiol                               | 2350              | 2605             | -9.79                |
| 44.869   | <b>Alkane standard</b> | <b>n-Tetracosane</b>                      | <b>NA</b>         | <b>NA</b>        | <b>NA</b>            |
| 44.888   | Alien Dawg             | DELTA 1-Tetrahydrocannabinol              | 2401              | 2552             | -5.91                |
| 45.123   | Alien Dawg             | DELTA 9-tetrahydrocannabinol methyl ether | 2415              | 2443             | -1.14                |
| 45.123   | Sensi Star             | DELTA 9-tetrahydrocannabinol methyl ether | 2415              | 2443             | -1.14                |
| 45.123   | Quadra                 | DELTA 9-tetrahydrocannabinol methyl ether | 2415              | 2443             | -1.14                |
| 45.123   | Gabriola               | DELTA 9-tetrahydrocannabinol methyl ether | 2415              | 2443             | -1.14                |
| 45.123   | Island Honey           | DELTA 9-tetrahydrocannabinol methyl ether | 2415              | 2443             | -1.14                |
| 45.454   | Tangerine Dream        | Cannabidiol                               | 2435              | 2605             | -6.52                |
| 45.454   | Sensi Star             | Cannabidiol                               | 2435              | 2605             | -6.52                |
| 45.454   | Quadra                 | Cannabidiol                               | 2435              | 2605             | -6.52                |
| 45.454   | Island Honey           | Cannabidiol                               | 2435              | 2605             | -6.52                |
| 45.46    | Gabriola               | Cannabidiol                               | 2435              | 2605             | -6.51                |
| 45.467   | Alien Dawg             | DELTA 9-Tetrahydrocannabinol              | 2436              | 2475             | -1.58                |
| 45.549   | Tangerine Dream        | Cannabichrome                             | 2441              | 2486             | -1.82                |
| 45.562   | Sensi Star             | Cannabichrome                             | 2442              | 2486             | -1.79                |
| 45.575   | Alien Dawg             | Cannabichrome                             | 2442              | 2486             | -1.76                |
| 45.588   | Gabriola               | Cannabichrome                             | 2443              | 2486             | -1.72                |
| 45.607   | Quadra                 | Cannabichrome                             | 2444              | 2486             | -1.68                |
| 45.607   | Island Honey           | Cannabichrome                             | 2444              | 2486             | -1.68                |
| 46.345   | Tangerine Dream        | DELTA 9-Tetrahydrocannabinol              | 2489              | 2475             | 0.55                 |
| 46.351   | Sensi Star             | exo-THC, acetate                          | 2489              | 2629             | -5.33                |
| 46.357   | Alien Dawg             | DELTA 9-Tetrahydrocannabinol              | 2489              | 2475             | 0.58                 |
| 46.357   | Island Honey           | exo-THC, acetate                          | 2489              | 2629             | -5.32                |
| 46.358   | Quadra                 | exo-THC, acetate                          | 2489              | 2629             | -5.31                |
| 46.364   | Gabriola               | exo-THC, acetate                          | 2490              | 2629             | -5.30                |

Table S4. Continued

| RT (min) | Cultivar               | Compound name                                | RI (experimental) | RI (Theoretical) | RI Relative variance |
|----------|------------------------|----------------------------------------------|-------------------|------------------|----------------------|
| 46.485   | Island Honey           | 3-Methoxy-5-pentyl-2-prenylphenyl, acetate   | 2497              | 2256             | 10.68                |
| 46.491   | Gabriola               | 3-Methoxy-5-pentyl-2-prenylphenyl, acetate   | 2497              | 2256             | 10.70                |
| 46.536   | <b>Alkane standard</b> | <b>n-Pentacosane</b>                         | <b>NA</b>         | <b>NA</b>        | <b>NA</b>            |
| 47.445   | Sensi Star             | (-)-.DELTA.9-THC                             | 2561              | 2475             | 3.47                 |
| 47.47    | Tangerine Dream        | (-)-.DELTA.9-THC                             | 2562              | 2475             | 3.53                 |
| 47.541   | Alien Dawg             | (-)-.DELTA.9-THC                             | 2567              | 2475             | 3.73                 |
| 47.566   | Quadra                 | (-)-.DELTA.9-THC                             | 2569              | 2475             | 3.79                 |
| 47.566   | Gabriola               | (-)-.DELTA.9-THC                             | 2569              | 2475             | 3.79                 |
| 47.566   | Island Honey           | (-)-.DELTA.9-THC                             | 2569              | 2475             | 3.79                 |
| 47.955   | Island Honey           | Cannabigerol                                 | 2595              | 2610             | -0.58                |
| 48.024   | <b>Alkane standard</b> | <b>n-Hexacosane</b>                          | <b>NA</b>         | <b>NA</b>        | <b>NA</b>            |
| 48.056   | Island Honey           | Cannabinol                                   | 2603              | 2582             | 0.83                 |
| 48.075   | Quadra                 | Cannabinol                                   | 2606              | 2582             | 0.93                 |
| 48.075   | Gabriola               | Cannabinol                                   | 2606              | 2582             | 0.93                 |
| 48.094   | Sensi Star             | Cannabigerol                                 | 2609              | 2610             | -0.05                |
| 48.756   | <b>Alkane standard</b> | <b>n-Heptacosane</b>                         | <b>NA</b>         | <b>NA</b>        | <b>NA</b>            |
| 48.75    | Tangerine Dream        | Heptacosane                                  | 2699              | 2705             | -0.22                |
| 48.756   | Alien Dawg             | Heptacosane                                  | 2700              | 2705             | -0.18                |
| 48.756   | Sensi Star             | Heptacosane                                  | 2700              | 2705             | -0.18                |
| 48.756   | Gabriola               | Heptacosane                                  | 2700              | 2705             | -0.18                |
| 48.756   | Island Honey           | Heptacosane                                  | 2700              | 2705             | -0.18                |
| 48.762   | Quadra                 | Heptacosane                                  | 2701              | 2705             | -0.15                |
| 48.826   | Quadra                 | 8-alpha-Hydroxy-delta-9-tetrahydrocannabinol | 2711              | 2663             | 1.81                 |
| 48.826   | Island Honey           | 8-alpha-Hydroxy-delta-9-tetrahydrocannabinol | 2711              | 2663             | 1.81                 |
| 48.832   | Gabriola               | 8-alpha-Hydroxy-delta-9-tetrahydrocannabinol | 2712              | 2663             | 1.84                 |
| 49.38    | <b>Alkane standard</b> | <b>n-Octacosane</b>                          | <b>NA</b>         | <b>NA</b>        | <b>NA</b>            |
| 50.022   | Alien Dawg             | Nonacosane                                   | 2899              | 2904             | -0.175               |
| 50.022   | Tangerine Dream        | Nonacosane                                   | 2899              | 2904             | -0.175               |
| 50.022   | Sensi Star             | Nonacosane                                   | 2899              | 2904             | -0.175               |
| 50.022   | Quadra                 | Nonacosane                                   | 2899              | 2904             | -0.175               |
| 50.022   | Gabriola               | Nonacosane                                   | 2899              | 2904             | -0.175               |
| 50.022   | Island Honey           | Nonacosane                                   | 2899              | 2904             | -0.175               |
| 50.028   | <b>Alkane standard</b> | <b>n-Nonacosane</b>                          | <b>NA</b>         | <b>NA</b>        | <b>NA</b>            |
| 50.722   | <b>Alkane standard</b> | <b>n-Triacontane</b>                         | <b>NA</b>         | <b>NA</b>        | <b>NA</b>            |

Table S5. Cannabinoids quantified using a targeted LC-MS/MS metabolomics assay.

| Cannabinoid<br>(mg per g)                                | Cultivar          |                  |                  |                  |                   |                  |
|----------------------------------------------------------|-------------------|------------------|------------------|------------------|-------------------|------------------|
|                                                          | Alien Dawg        | Tangerine Dream  | Sensi Star       | Quadra           | Gabriola          | Island Honey     |
| Cannabichromene (CBC)                                    | 0.235 ± 0.0131    | 0.778 ± 0.0069   | 0.703 ± 0.0221   | 1.28 ± 0.0588    | 0.373 ± 0.0197    | 0.258 ± 0.0002   |
| Cannabidiol (CBD)                                        | 0.850 ± 0.0387    | 0.245 ± 0.0195   | 0.459 ± 0.0433   | 0.230 ± 0.0056   | 0.331 ± 0.0020    | 0.197 ± 0.0031   |
| Cannabidiolic acid (CBDA)                                | 0.239 ± 0.0244    | 0.179 ± 0.0022   | 0.220 ± 0.0028   | 0.290 ± 0.0045   | 0.237 ± 0.0086    | 0.195 ± 0.0005   |
| Cannabidivarin (CBDV)                                    | 0.000312 ± 0.0001 | 0.00276 ± 0.0001 | 0.00293 ± 0.0001 | 0.00158 ± 0.0001 | 0.000644 ± 0.0001 | 0.00096 ± 0.0001 |
| Cannabidivarinic acid (CBDVA)                            | 0.0476 ± 0.0015   | 0.0844 ± 0.0023  | 0.045 ± 0.0005   | 0.0994 ± 0.0002  | 0.0752 ± 0.0009   | 0.0238 ± 0.0001  |
| Cannabigerol (CBG)                                       | 0.774 ± 0.0024    | 0.813 ± 0.0441   | 1.5 ± 0.035      | 0.273 ± 0.0030   | 0.256 ± 0.0014    | 0.811 ± 0.0115   |
| Cannabigerolic acid (CBGA)                               | 0.244 ± 0.0141    | 0.258 ± 0.0101   | 0.541 ± 0.002    | 0.304 ± 0.0008   | 0.261 ± 0.0045    | 0.294 ± 0.0064   |
| Cannabicyclol (CBL)                                      | 0.206 ± 0.0024    | 0.794 ± 0.0133   | 0.882 ± 0.010    | 1.78 ± 0.0522    | 0.813 ± 0.0143    | 0.193 ± 0.0081   |
| Cannabicyclic acid (CBLA) + cannabichromenic acid (CBCA) | 0.109 ± 0.0012    | 0.0858 ± 0.0063  | 0.0946 ± 0.004   | 0.127 ± 0.0004   | 0.0814 ± 0.0004   | 0.096 ± 0.0079   |
| Cannabinol (CBN)                                         | 0.647 ± 0.0145    | 0.67 ± 0.0464    | 0.318 ± 0.033    | 0.498 ± 0.0029   | 0.198 ± 0.0079    | 0.143 ± 0.0021   |
| Cannabinolic acid (CBNA)                                 | 0.177 ± 0.0053    | 0.159 ± 0.0046   | 0.198 ± 0.014    | 0.218 ± 0.0004   | 0.147 ± 0.0042    | 0.158 ± 0.0021   |
| Δ9-Tetrahydrocannabinol (THC)                            | 5.81 ± 0.142      | 2.88 ± 0.170     | 8.14 ± 0.344     | 3.55 ± 0.126     | 4.07 ± 0.0153     | 4.3 ± 0.109      |
| Tetrahydrocannabinolic acid (THCA)                       | 162 ± 6.53        | 133 ± 3.99       | 162 ± 7.13       | 174 ± 2.96       | 133 ± 1.68        | 129 ± 5.41       |
| 11-Nor-9-carboxy-Tetrahydrocannabinol (THC-COOH)         | 0.0937 ± 0.0015   | 0.05751 ± 0.0016 | 0.0603 ± 0.001   | 0.109 ± 0.003    | 0.186 ± 0.0097    | 0.0141 ± 0.0084  |
| Tetrahydrocannabinol (THCV)                              | 0.228 ± 0.0067    | 0.353 ± 0.011    | 0.248 ± 0.001    | 0.246 ± 0.005    | 0.17 ± 0.0061     | 0.117 ± 0.0013   |

Table S6. Targeted LC-MS/MS analysis of phenolic compounds found in cannabis.

| Polyphenol<br>(mg/g dry weight) | Cultivars              |                      |                      |                       |                      |                      |
|---------------------------------|------------------------|----------------------|----------------------|-----------------------|----------------------|----------------------|
|                                 | Alien Dawg             | Tangerine Dream      | Sensi Star           | Quadra                | Gabriola             | Island Honey         |
| Apigenin                        | 0.000680 ± 0.0000299   | 0.000420 ± 0.0000133 | 0.00270 ± 0.0000286  | 0.000610 ± 0.0000132  | 0.000820 ± 0.0000204 | 0.000420 ± 0.0000282 |
| Caffeic acid                    | 0.00200 ± 0.0000188    | 0.00292 ± 0.0000118  | 0.00119 ± 0.0000421  | 0.000960 ± 0.0000426  | 0.00112 ± 0.0000244  | 0.00138 ± 0.0000175  |
| Catechin                        | 0.149 ± 0.00792        | 0.151 ± 0.00290      | 0.136 ± 0.000728     | 0.171 ± 0.00345       | 0.128 ± 0.000745     | 0.138 ± 0.00356      |
| p-coumaric acid                 | 0.0168 ± 0.000618      | 0.0367 ± 0.000668    | 0.0184 ± 0.00157     | 0.00965 ± 0.000483    | 0.00253 ± 0.0000509  | 0.00608 ± 0.000166   |
| 3,4-Dihydroxybenzoic acid       | 0.0451 ± 0.00205       | 0.0336 ± 0.000931    | 0.0213 ± 0.0000313   | 0.0426 ± 0.000502     | 0.0253 ± 0.000196    | 0.0224 ± 0.000717    |
| Ferulic acid                    | 0.0213 ± 0.000874      | 0.0132 ± 0.000125    | 0.0114 ± 0.000356    | 0.00985 ± 0.000324    | 0.0108 ± 0.000258    | 0.0135 ± 0.000696    |
| Gallic acid                     | 0.000800 ± 0.000000848 | 0.00132 ± 0.00000275 | 0.000990 ± 0.0000199 | 0.000790 ± 0.00000782 | 0.00104 ± 0.0000224  | 0.000830 ± 0.0000470 |
| Gallocatechin                   | <LOD                   | ND                   | ND                   | <LOD                  | ND                   | ND                   |
| Kaempferol                      | 0.0140 ± 0.000405      | 0.00735 ± 0.000225   | 0.00459 ± 0.000230   | 0.00446 ± 0.000109    | 0.00443 ± 0.000218   | 0.00364 ± 0.000287   |
| Isorhamnetin                    | 0.00174 ± 0.0000188    | 0.00117 ± 0.00000559 | 0.000580 ± 0.0000244 | 0.000750 ± 0.0000368  | 0.00103 ± 0.00000534 | 0.000390 ± 0.0000143 |
| Myricetin                       | 0.0214 ± 0.000551      | 0.0207 ± 0.000426    | 0.0182 ± 0.000520    | 0.0199 ± 0.000450     | 0.0190 ± 0.000765    | 0.0191 ± 0.0000426   |
| Naringenin                      | <LOD                   | <LOD                 | 0.000840 ± 0.0000146 | 0.000620 ± 0.0000125  | <LOD                 | <LOD                 |
| Piceol                          | ND                     | 0.00679 ± 0.0000645  | 0.00603 ± 0.000198   | ND                    | ND                   | 0.00643 ± 0.0000139  |
| Protocatechuic aldehyde         | 0.00458 ± 0.0000330    | 0.00181 ± 0.0000217  | 0.00149 ± 0.000145   | 0.00170 ± 0.00000707  | 0.00208 ± 0.00000532 | 0.00295 ± 0.0000287  |
| Pungentol                       | <LOD                   | ND                   | ND                   | <LOD                  | ND                   | ND                   |
| Quercetin                       | 0.0203 ± 0.000988      | 0.0224 ± 0.000539    | 0.00385 ± 0.000229   | 0.00387 ± 0.000338    | 0.00604 ± 0.000312   | 0.00340 ± 0.000198   |
| Taxifolin                       | 0.0167 ± 0.000571      | 0.0175 ± 0.00131     | 0.0163 ± 0.0000899   | 0.0166 ± 0.0000311    | 0.0166 ± 0.000184    | 0.0170 ± 0.000182    |
| Vanillic acid                   | 0.00630 ± 0.000199     | 0.00742 ± 0.000400   | <LOD                 | 0.00965 ± 0.000875    | 0.0184 ± 0.000847    | 0.00485 ± 0.000415   |
| Vanillin                        | 0.0294 ± 0.00151       | 0.0277 ± 0.00173     | 0.0252 ± 0.000297    | 0.0279 ± 0.00224      | 0.0281 ± 0.00200     | 0.0290 ± 0.000519    |

Abbreviations: ND – not detected; &lt;LOD – below limit of detection.



Table S7. Pesticides quantified in select cannabis cultivars.

| Pesticide (ppm)     | Cultivar             |                   |                      |                      |          |                      |
|---------------------|----------------------|-------------------|----------------------|----------------------|----------|----------------------|
|                     | Alien Dawg           | Tangerine Dream   | Sensi Star           | Quadra               | Gabriola | Island Honey         |
| Acephate            | < LOQ                | < LOQ             | < LOQ                | < LOQ                | < LOQ    | < LOQ                |
| Acetomiprid         | < LOQ                | < LOQ             | < LOQ                | < LOQ                | < LOQ    | < LOQ                |
| Aldicarb            | < LOQ                | < LOQ             | < LOQ                | < LOQ                | < LOQ    | < LOQ                |
| Allethrin           | < LOQ                | < LOQ             | < LOQ                | < LOQ                | < LOQ    | 0.0285<br>(± 0.0055) |
| Azoxystrobin        | < LOQ                | < LOQ             | < LOQ                | < LOQ                | < LOQ    | < LOQ                |
| Benzovindiflupyr    | 0.0349<br>(± 0.0078) | 0.0059 (± 0.0001) | < LOQ                | 0.0099<br>(± 0.0003) | < LOQ    | 0.0057<br>(± 0.0019) |
| Bifenazate          | < LOQ                | < LOQ             | < LOQ                | < LOQ                | < LOQ    | < LOQ                |
| Boscalid            | 0.0033<br>(± 0.0023) | < LOQ             | 0.0166<br>(± 0.0011) | 0.0058<br>(± 0.0005) | < LOQ    | < LOQ                |
| Buprofezin          | < LOQ                | < LOQ             | < LOQ                | < LOQ                | < LOQ    | < LOQ                |
| Carbaryl            | < LOQ                | < LOQ             | < LOQ                | < LOQ                | < LOQ    | < LOQ                |
| Carbofuran          | < LOQ                | < LOQ             | < LOQ                | < LOQ                | < LOQ    | < LOQ                |
| Chlorantraniliprole | < LOQ                | < LOQ             | < LOQ                | < LOQ                | < LOQ    | < LOQ                |
| Chlorpyrifos        | < LOQ                | < LOQ             | < LOQ                | < LOQ                | < LOQ    | < LOQ                |
| Clofentezine        | < LOQ                | < LOQ             | < LOQ                | < LOQ                | < LOQ    | < LOQ                |
| Clothianidin        | < LOQ                | < LOQ             | < LOQ                | < LOQ                | < LOQ    | < LOQ                |
| Coumaphos           | < LOQ                | < LOQ             | < LOQ                | < LOQ                | < LOQ    | < LOQ                |
| Cyantraniliprole    | < LOQ                | < LOQ             | < LOQ                | < LOQ                | < LOQ    | < LOQ                |
| Cyprodinil          | < LOQ                | < LOQ             | < LOQ                | < LOQ                | < LOQ    | < LOQ                |
| Diazinon            | < LOQ                | < LOQ             | < LOQ                | < LOQ                | < LOQ    | < LOQ                |
| Dichlorvos          | < LOQ                | < LOQ             | < LOQ                | < LOQ                | < LOQ    | < LOQ                |
| Dimethoate          | < LOQ                | < LOQ             | < LOQ                | < LOQ                | < LOQ    | < LOQ                |
| Dinotefuran         | < LOQ                | < LOQ             | < LOQ                | < LOQ                | < LOQ    | < LOQ                |
| Dodemorph           | < LOQ                | < LOQ             | < LOQ                | < LOQ                | < LOQ    | < LOQ                |
| Ethoprophos         | < LOQ                | < LOQ             | 0.0032<br>(± 0.0002) | < LOQ                | < LOQ    | < LOQ                |
| Etofenprox          | < LOQ                | < LOQ             | < LOQ                | < LOQ                | < LOQ    | < LOQ                |
| Etoxazole           | < LOQ                | < LOQ             | < LOQ                | < LOQ                | < LOQ    | < LOQ                |
| Fenoxycarb          | < LOQ                | < LOQ             | < LOQ                | < LOQ                | < LOQ    | < LOQ                |
| Fenpyroximate       | < LOQ                | < LOQ             | < LOQ                | < LOQ                | < LOQ    | < LOQ                |
| Fensulfothion       | < LOQ                | < LOQ             | < LOQ                | < LOQ                | < LOQ    | 0.1365<br>(± 0.0109) |
| Fenthion            | < LOQ                | < LOQ             | < LOQ                | < LOQ                | < LOQ    | < LOQ                |
| Flonicamid          | < LOQ                | < LOQ             | < LOQ                | < LOQ                | < LOQ    | < LOQ                |
| Fluopyram           | < LOQ                | < LOQ             | < LOQ                | < LOQ                | < LOQ    | < LOQ                |
| Hexythiazox         | < LOQ                | < LOQ             | < LOQ                | < LOQ                | < LOQ    | < LOQ                |
| Imazalil            | < LOQ                | < LOQ             | < LOQ                | < LOQ                | < LOQ    | < LOQ                |
| Imidacloprid        | < LOQ                | < LOQ             | < LOQ                | < LOQ                | < LOQ    | < LOQ                |
| Jasmolin            | 0.0359<br>(± 0.0146) | < LOQ             | < LOQ                | < LOQ                | < LOQ    | < LOQ                |
| Kresoxim-Methyl     | < LOQ                | < LOQ             | < LOQ                | < LOQ                | < LOQ    | < LOQ                |
| Malathion           | < LOQ                | < LOQ             | < LOQ                | < LOQ                | 0.002    | < LOQ                |

|                    |                       |                   |                      |                     |                      |                      |
|--------------------|-----------------------|-------------------|----------------------|---------------------|----------------------|----------------------|
| Metalaxyl          | 0.025<br>(± 0.0064)   | 0.0047 (± 0.0016) | < LOQ                | < LOQ               | < LOQ                | 0.0112<br>(± 0.003)  |
| Methiocarb         | < LOQ                 | < LOQ             | < LOQ                | < LOQ               | < LOQ                | < LOQ                |
| Methoprene         | 2.9 (± 0.2263)        | < LOQ             | < LOQ                | < LOQ               | < LOQ                | < LOQ                |
| Mevinphos          | 0.0027<br>(± 0.00004) | < LOQ             | 0.0126<br>(± 0.0031) | < LOQ               | 0.0045<br>(± 0.0014) | < LOQ                |
| MGK-264            | < LOQ                 | < LOQ             | < LOQ                | < LOQ               | < LOQ                | < LOQ                |
| Myclobutanil       | < LOQ                 | < LOQ             | < LOQ                | < LOQ               | < LOQ                | < LOQ                |
| Naled              | < LOQ                 | 0.0039 (± 0.0015) | < LOQ                | < LOQ               | < LOQ                | < LOQ                |
| Novaluron          | < LOQ                 | < LOQ             | < LOQ                | < LOQ               | < LOQ                | < LOQ                |
| Oxamyl             | < LOQ                 | < LOQ             | < LOQ                | < LOQ               | < LOQ                | < LOQ                |
| Paclobutrazol      | < LOQ                 | < LOQ             | < LOQ                | < LOQ               | < LOQ                | < LOQ                |
| Phenothrin         | < LOQ                 | < LOQ             | < LOQ                | < LOQ               | < LOQ                | < LOQ                |
| Phosmet            | < LOQ                 | < LOQ             | < LOQ                | < LOQ               | < LOQ                | < LOQ                |
| Pirimicarb         | < LOQ                 | < LOQ             | < LOQ                | < LOQ               | < LOQ                | < LOQ                |
| Prallethrin        | < LOQ                 | < LOQ             | < LOQ                | < LOQ               | < LOQ                | < LOQ                |
| Propoxur           | < LOQ                 | < LOQ             | < LOQ                | < LOQ               | 0.0126<br>(± 0.0014) | 0.0061<br>(± 0.0016) |
| Pyraclostrobin     | < LOQ                 | < LOQ             | < LOQ                | < LOQ               | < LOQ                | < LOQ                |
| Pyrethrins         | < LOQ                 | < LOQ             | < LOQ                | < LOQ               | < LOQ                | < LOQ                |
| Pyridaben          | < LOQ                 | < LOQ             | < LOQ                | < LOQ               | < LOQ                | < LOQ                |
| Spinetoram         | < LOQ                 | < LOQ             | < LOQ                | < LOQ               | < LOQ                | < LOQ                |
| Spinosad A         | < LOQ                 | < LOQ             | < LOQ                | < LOQ               | < LOQ                | < LOQ                |
| Spinosad B         | < LOQ                 | < LOQ             | < LOQ                | < LOQ               | < LOQ                | < LOQ                |
| Spiridiclofen      | < LOQ                 | < LOQ             | < LOQ                | 0.261<br>(± 0.0495) | < LOQ                | < LOQ                |
| Spiromesifen       | < LOQ                 | < LOQ             | < LOQ                | < LOQ               | < LOQ                | < LOQ                |
| Spiroxamine        | < LOQ                 | < LOQ             | < LOQ                | < LOQ               | < LOQ                | < LOQ                |
| Tebuconazole       | < LOQ                 | < LOQ             | < LOQ                | < LOQ               | < LOQ                | < LOQ                |
| Tebufenozide       | < LOQ                 | < LOQ             | < LOQ                | < LOQ               | < LOQ                | < LOQ                |
| Teflubenzuron      | < LOQ                 | < LOQ             | < LOQ                | < LOQ               | < LOQ                | < LOQ                |
| Tetrachlorvinphos  | < LOQ                 | < LOQ             | < LOQ                | < LOQ               | < LOQ                | 0.021<br>(± 0.0127)  |
| Tetramethrin       | < LOQ                 | < LOQ             | < LOQ                | < LOQ               | < LOQ                | < LOQ                |
| Thiacloprid        | < LOQ                 | < LOQ             | < LOQ                | < LOQ               | < LOQ                | < LOQ                |
| Thiametoxam        | < LOQ                 | < LOQ             | < LOQ                | < LOQ               | < LOQ                | < LOQ                |
| Thiophanate-methyl | < LOQ                 | < LOQ             | < LOQ                | < LOQ               | < LOQ                | < LOQ                |
| Trifloxystrobin    | < LOQ                 | < LOQ             | < LOQ                | < LOQ               | < LOQ                | < LOQ                |

Table S8. Common plant metabolites detected in cannabis cultivars using TMIC Plant Prime assay.

| Metabolites            | Cannabis Cultivars (mg/g dry weight) |                       |                      |                       |                      |                        |
|------------------------|--------------------------------------|-----------------------|----------------------|-----------------------|----------------------|------------------------|
|                        | Alien Dawg                           | Tangerine Dream       | Sensi Star           | Quadra                | Gabriola             | Island Honey           |
| Glycine                | 0.137 ± 0.00300                      | 0.0849 ± 0.00367      | 0.104 ± 0.00482      | 0.177 ± 0.000290      | 0.0932 ± 0.00178     | 0.0520 ± 0.00116       |
| Alanine                | 0.284 ± 0.0160                       | 0.432 ± 0.0135        | 0.452 ± 0.00113      | 0.315 ± 0.00555       | 0.337 ± 0.00387      | 0.462 ± 0.00916        |
| Serine                 | 0.637 ± 0.0152                       | 0.588 ± 0.00552       | 0.386 ± 0.00957      | 0.404 ± 0.0116        | 0.372 ± 0.00558      | 0.511 ± 0.00202        |
| Histamine              | 0.000600 ± 0.0000618                 | 0.000300 ± 0.0000183  | 0.000200 ± 0.0000101 | 0.000006 ± 0.00000756 | 0.000300 ± 0.0000083 | 0.000900 ± 0.00000429  |
| Proline                | 1.13 ± 0.00510                       | 1.04 ± 0.0283         | 0.604 ± 0.0370       | 0.316 ± 0.00167       | 0.345 ± 0.000272     | 2.73 ± 0.104           |
| Valine                 | 0.537 ± 0.00197                      | 0.172 ± 0.00684       | 0.198 ± 0.00368      | 0.439 ± 0.0105        | 0.334 ± 0.00661      | 0.422 ± 0.0184         |
| Threonine              | 0.281 ± 0.00987                      | 0.175 ± 0.00207       | 0.129 ± 0.000501     | 0.240 ± 0.0115        | 0.241 ± 0.0190       | 0.201 ± 0.00235        |
| Phenylethylamine       | 0.000100 ± 0.00000169                | 0.000100 ± 0.00000175 | 0                    | 0.000200 ± 0.00000868 | 0.000700 ± 0.0000153 | 0.000100 ± 0.000000142 |
| Taurine                | 0.00290 ± 0.0000508                  | 0.000500 ± 0.00000221 | 0.00370 ± 0.000163   | 0.00470 ± 0.0000103   | 0.00120 ± 0.0000671  | 0.00200 ± 0.000117     |
| Putrescine             | 0.00170 ± 0.00000466                 | 0.00120 ± 0.0000223   | 0.00100 ± 0.0000113  | 0.000900 ± 0.0000201  | 0.000900 ± 0.0000272 | 0.000900 ± 0.0000428   |
| trans-Hydroxyproline   | 0.00220 ± 0.0000378                  | 0.00380 ± 0.000153    | 0.00300 ± 0.000203   | 0.00330 ± 0.000171    | 0.00340 ± 0.000181   | 0.00440 ± 0.0000385    |
| Leucine                | 0.303 ± 0.000171                     | 0.165 ± 0.000203      | 0.0575 ± 0.00233     | 0.184 ± 0.000271      | 0.159 ± 0.000148     | 0.207 ± 0.00343        |
| Isoleucine             | 0.416 ± 0.00936                      | 0.120 ± 0.00545       | 0.0613 ± 0.00154     | 0.331 ± 0.00168       | 0.191 ± 0.00332      | 0.429 ± 0.00274        |
| Asparagine             | 36.3 ± 0.694                         | 13.2 ± 0.747          | 27.0 ± 0.926         | 13.5 ± 0.317          | 16.4 ± 0.280         | 16.9 ± 0.0541          |
| Aspartic acid          | 1.45 ± 0.00487                       | 0.675 ± 0.0756        | 1.61 ± 0.114         | 0.391 ± 0.0166        | 1.28 ± 0.0432        | 0.827 ± 0.0102         |
| Glutamine              | 2.16 ± 0.00358                       | 5.35 ± 0.0326         | 2.24 ± 0.0296        | 0.631 ± 0.0172        | 4.87 ± 0.140         | 4.31 ± 0.00927         |
| Glutamic acid          | 0.516 ± 0.00816                      | 0.259 ± 0.0124        | 0.223 ± 0.00127      | 0.552 ± 0.00783       | 0.521 ± 0.0157       | 0.225 ± 0.00897        |
| Methionine             | 0.00740 ± 0.000470                   | 0.0138 ± 0.000654     | 0.00800 ± 0.000503   | 0.0117 ± 0.000716     | 0.00960 ± 0.000283   | 0.0124 ± 0.000588      |
| Histidine              | 0.673 ± 0.0321                       | 0.299 ± 0.00572       | 0.526 ± 0.00831      | 0.382 ± 0.00916       | 0.875 ± 0.0220       | 1.02 ± 0.00393         |
| alpha-Aminoadipic acid | 0.103 ± 0.00190                      | 0.0377 ± 0.000550     | 0.111 ± 0.00277      | 0.0301 ± 0.00153      | 0.0522 ± 0.00118     | 0.0933 ± 0.000190      |
| Phenylalanine          | 0.307 ± 0.0164                       | 0.0507 ± 0.000458     | 0.143 ± 0.00894      | 0.208 ± 0.00570       | 0.335 ± 0.00108      | 0.150 ± 0.00214        |
| Methionine-sulfoxide   | 0.00630 ± 0.000454                   | 0.0175 ± 0.000814     | 0.00750 ± 0.0000149  | 0.0296 ± 0.00320      | 0.0540 ± 0.00399     | 0.0172 ± 0.000330      |
| Arginine               | 7.91 ± 0.0564                        | 4.65 ± 0.00977        | 3.47 ± 0.101         | 4.58 ± 0.0182         | 4.77 ± 0.00468       | 6.11 ± 0.0801          |
| Acetyl-ornithine       | 0.0230 ± 0.00155                     | 0.0109 ± 0.000775     | 0.0119 ± 0.000105    | 0.0174 ± 0.000572     | 0.0148 ± 0.000277    | 0.0222 ± 0.000668      |
| Citrulline             | 0.0731 ± 0.00222                     | 0.0583 ± 0.00126      | 0.0237 ± 0.00118     | 0.0297 ± 0.00171      | 0.0657 ± 0.00606     | 0.0557 ± 0.000735      |
| Tyrosine               | 0.108 ± 0.00129                      | 0.0532 ± 0.00107      | 0.0678 ± 0.000303    | 0.0756 ± 0.00166      | 0.0587 ± 0.00313     | 0.0544 ± 0.00259       |

|                                    |                       |                       |                       |                        |                       |                      |
|------------------------------------|-----------------------|-----------------------|-----------------------|------------------------|-----------------------|----------------------|
| <b>Asymmetric dimethylarginine</b> | 0.00690 ± 0.000218    | 0.000300 ± 0.00000957 | 0.00370 ± 0.000217    | 0.00220 ± 0.0000926    | 0.00250 ± 0.000153    | 0.00370 ± 0.0000944  |
| <b>Total dimethylarginine</b>      | 0.0105 ± 0.000267     | 0.00540 ± 0.0000880   | 0.00770 ± 0.000144    | 0.00680 ± 0.000177     | 0.00600 ± 0.0000461   | 0.00630 ± 0.00017    |
| <b>Tryptophan</b>                  | 0.396 ± 0.0166        | 0.166 ± 0.00452       | 0.210 ± 0.00347       | 0.245 ± 0.00165        | 0.846 ± 0.0402        | 0.400 ± 0.0177       |
| <b>Kynurenine</b>                  | 0.00170 ± 0.0000320   | 0.000500 ± 0.0000141  | 0.000400 ± 0.00000306 | 0.000400 ± 0.0000168   | 0.000500 ± 0.00000164 | 0.00160 ± 0.0000872  |
| <b>Ornithine</b>                   | 0.0936 ± 0.00174      | 0.0374 ± 0.000278     | 0.00590 ± 0.000251    | 0.0155 ± 0.000377      | 0.0107 ± 0.000159     | 0.0351 ± 0.00240     |
| <b>Lysine</b>                      | 0.413 ± 0.00896       | 0.203 ± 0.00401       | 0.0993 ± 0.00233      | 0.157 ± 0.0132         | 0.247 ± 0.0102        | 0.304 ± 0.00371      |
| <b>Spermidine</b>                  | 0.00150 ± 0.0000393   | 0.00210 ± 0.0000823   | 0.00140 ± 0.0000540   | 0.00460 ± 0.000238     | 0.00120 ± 0.0000544   | 0.00810 ± 0.000647   |
| <b>Spermine</b>                    | 0.000900 ± 0.0000266  | 0.000800 ± 0.0000209  | 0.00100 ± 0.0000226   | 0.000200 ± 0.000000704 | 0.000300 ± 0.00000543 | 0.00150 ± 0.0000513  |
| <b>Tyramine</b>                    | 0.0124 ± 0.000401     | 0.0407 ± 0.00158      | 0.00790 ± 0.000172    | 0.00880 ± 0.000994     | 0.00360 ± 0.000414    | 0.00730 ± 0.000476   |
| <b>Creatine</b>                    | 0.00350 ± 0.000117    | 0.00430 ± 0.0000628   | 0.00300 ± 0.000225    | 0.00190 ± 0.0000709    | 0.00200 ± 0.0000466   | 0.00190 ± 0.0000975  |
| <b>Betaine</b>                     | 0.0168 ± 0.000349     | 0.0104 ± 0.00000731   | 0.00950 ± 0.000494    | 0.00900 ± 0.000677     | 0.00750 ± 0.000509    | 0.0165 ± 0.000695    |
| <b>Choline</b>                     | 1.42 ± 0.0710         | 1.08 ± 0.000802       | 0.931 ± 0.0424        | 1.01 ± 0.0256          | 0.853 ± 0.0137        | 1.13 ± 0.0511        |
| <b>Trimethylamine N-oxide</b>      | 0.00320 ± 0.0000474   | 0.00370 ± 0.0000681   | 0.00300 ± 0.00000244  | 0.00280 ± 0.0000459    | 0.00280 ± 0.000128    | 0.00290 ± 0.000151   |
| <b>Methylhistidine</b>             | 0.00430 ± 0.0000856   | 0.00220 ± 0.0000422   | 0.00460 ± 0.0000414   | 0.00410 ± 0.000171     | 0.00400 ± 0.000106    | 0.00760 ± 0.000420   |
| <b>Shikimic acid</b>               | 0.00170 ± 0.0000590   | 0.00170 ± 0.00000597  | 0.00210 ± 0.0000355   | 0.00100 ± 0.0000483    | 0.00140 ± 0.0000114   | 0.00140 ± 0.0000846  |
| <b>Glyceric acid</b>               | 0.158 ± 0.00370       | 0.243 ± 0.0168        | 0.314 ± 0.0377        | 0.246 ± 0.00270        | 0.0624 ± 0.00172      | 0.199 ± 0.00261      |
| <b>beta-Hydroxybutyric acid</b>    | 0.00520 ± 0.000145    | 0.00900 ± 0.000344    | 0.00820 ± 0.000287    | 0.00920 ± 0.000480     | 0.00680 ± 0.000313    | 0.00470 ± 0.000275   |
| <b>Lactic acid</b>                 | 0.0221 ± 0.00120      | 0.0443 ± 0.000735     | 0.0132 ± 0.00106      | 0.0182 ± 0.00151       | 0.00990 ± 0.000691    | 0.0400 ± 0.00326     |
| <b>HPPHA</b>                       | 0.000100 ± 0.00000225 | 0.000100 ± 0.00000542 | 0.000100 ± 0.00000747 | 0.000100 ± 0.00000864  | 0.000100 ± 0.00000938 | 0.000100 ± 0.0000197 |
| <b>Homovanillic acid</b>           | 0.000100 ± 0.00000276 | 0.000200 ± 0.00000390 | 0.000300 ± 0.00000227 | 0.000100 ± 0.00000752  | 0.000700 ± 0.0000462  | 0.00130 ± 0.0000767  |
| <b>Propionic acid</b>              | 0.00930 ± 0.000365    | 0.00250 ± 0.0000160   | 0.0238 ± 0.00197      | 0.0182 ± 0.00166       | 0.0188 ± 0.00297      | 0.0195 ± 0.000645    |
| <b>p-Hydroxyphenylacetic acid</b>  | 0.00180 ± 0.0000763   | 0.00130 ± 0.0000189   | 0.00130 ± 0.0000404   | 0.00200 ± 0.000178     | 0.00240 ± 0.0000581   | 0.00280 ± 0.000168   |
| <b>Malic acid</b>                  | 0.716 ± 0.00656       | 0.475 ± 0.00309       | 0.921 ± 0.00254       | 0.216 ± 0.0108         | 0.288 ± 0.032         | 0.583 ± 0.0391       |
| <b>Butyric acid</b>                | 0.0211 ± 0.00172      | 0.0362 ± 0.00409      | 0.0263 ± 0.000618     | 0.00560 ± 0.000218     | 0.0121 ± 0.0000626    | 0.0160 ± 0.000558    |
| <b>Hippuric acid</b>               | 0.00320 ± 0.000105    | 0.000500 ± 0.0000215  | 0.00100 ± 0.0000142   | 0.00120 ± 0.0000940    | 0.00110 ± 0.000128    | 0.00100 ± 0.0000481  |

|                                |                       |                       |                       |                        |                      |                       |
|--------------------------------|-----------------------|-----------------------|-----------------------|------------------------|----------------------|-----------------------|
| <b>Succinic acid</b>           | 0.0337 ± 0.000775     | 0.0289 ± 0.0000902    | 0.0616 ± 0.00312      | 0.0291 ± 0.00160       | 0.0383 ± 0.00131     | 0.0379 ± 0.00265      |
| <b>Glutaric acid</b>           | 0.0314 ± 0.000681     | 0.0279 ± 0.000274     | 0.0655 ± 0.00282      | 0.0346 ± 0.00526       | 0.0190 ± 0.00145     | 0.0785 ± 0.00539      |
| <b>Methylmalonic acid</b>      | 0.000300 ± 0.00000816 | 0.000200 ± 0.00000182 | 0.000300 ± 0.00000690 | 0.000300 ± 0.0000240   | 0.000300 ± 0.0000306 | 0.000200 ± 0.00000292 |
| <b>Fumaric acid</b>            | 0.0222 ± 0.00109      | 0.0142 ± 0.000285     | 0.0745 ± 0.000122     | 0.00700 ± 0.000938     | 0.0121 ± 0.000869    | 0.0209 ± 0.000978     |
| <b>Benzoic acid</b>            | 0.0456 ± 0.000362     | 0.0225 ± 0.000783     | 0.0943 ± 0.00280      | 0.0718 ± 0.00147       | 0.0861 ± 0.00334     | 0.0436 ± 0.000872     |
| <b>Oxalic acid</b>             | 0.196 ± 0.000122      | 0.0242 ± 0.000109     | 1.43 ± 0.0366         | 0.0181 ± 0.000847      | 0.0162 ± 0.000930    | 0.0332 ± 0.000677     |
| <b>Salicylic acid</b>          | 0.0231 ± 0.00107      | 0.00850 ± 0.000239    | 0.0104 ± 0.0000591    | 0.0214 ± 0.000749      | 0.0236 ± 0.000913    | 0.0103 ± 0.000375     |
| <b>Citric acid</b>             | 6.76 ± 0.183          | 4.05 ± 0.0286         | 11.4 ± 0.0886         | 1.98 ± 0.0613          | 4.42 ± 0.0247        | 6.28 ± 0.151          |
| <b>Abscisic acid</b>           | 0.00270 ± 0.0000286   | 0.000600 ± 0.00000768 | 0.00260 ± 0.0000426   | 0.000700 ± 0.0000167   | 0.00180 ± 0.0000178  | 0.000700 ± 0.0000347  |
| <b>Aconitic acid</b>           | 0.919 ± 0.0234        | 0.289 ± 0.0151        | 1.14 ± 0.0971         | 0.121 ± 0.00180        | 0.257 ± 0.00694      | 0.508 ± 0.00452       |
| <b>Jasmonic acid</b>           | 0.0112 ± 0.0000738    | 0.00990 ± 0.000148    | 0.0202 ± 0.000158     | 0.00940 ± 0.000151     | 0.00880 ± 0.000305   | 0.0266 ± 0.00140      |
| <b>Pyruvic acid</b>            | 0.00180 ± 0.0000229   | 0.00270 ± 0.0000135   | 0.00340 ± 0.000140    | 0.00240 ± 0.0000694    | 0.00240 ± 0.0000576  | 0.00260 ± 0.0000666   |
| <b>alpha-Ketoglutaric acid</b> | 0.00130 ± 0.0000176   | 0.00360 ± 0.0000418   | 0.00250 ± 0.0000227   | 0.000500 ± 0.000000750 | 0.00130 ± 0.000117   | 0.00190 ± 0.0000608   |
| <b>Uric acid</b>               | 0.0218 ± 0.000286     | 0.0149 ± 0.000794     | 0.0110 ± 0.000395     | 0.0195 ± 0.00137       | 0.0240 ± 0.000547    | 0.0299 ± 0.00127      |
| <b>Glucose</b>                 | 0.973 ± 0.0445        | 22.6 ± 0.0659         | 4.03 ± 0.0146         | 2.57 ± 0.0459          | 4.39 ± 0.122         | 15.1 ± 1.33           |
| <b>LysoPC a C16:0</b>          | 0.00390 ± 0.000154    | 0.00600 ± 0.000332    | 0.00520 ± 0.0000441   | 0.00560 ± 0.000578     | 0.00940 ± 0.00114    | 0.00640 ± 0.000746    |
| <b>LysoPC a C18:2</b>          | 0.00470 ± 0.000129    | 0.00600 ± 0.000112    | 0.0136 ± 0.000680     | 0.00470 ± 0.000205     | 0.0112 ± 0.000314    | 0.00550 ± 0.000308    |
| <b>LysoPC a C18:1</b>          | 0.00120 ± 0.0000316   | 0.00190 ± 0.00000694  | 0.00220 ± 0.000187    | 0.00240 ± 0.000175     | 0.00160 ± 0.0000877  | 0.00110 ± 0.0000578   |
| <b>PC aa C36:6</b>             | 0.000900 ± 0.0000457  | 0.00150 ± 0.0000347   | 0.00170 ± 0.0000311   | 0.00160 ± 0.0000442    | 0.00140 ± 0.0000336  | 0.00170 ± 0.0000916   |
| <b>PC aa C36:0</b>             | 0.000400 ± 0.0000209  | 0.000600 ± 0.0000144  | 0.000300 ± 0.00000501 | 0.000400 ± 0.0000366   | 0.000600 ± 0.0000262 | 0.000400 ± 0.00000476 |
| <b>Carnitine</b>               | 0.00560 ± 0.000108    | 0.00370 ± 0.0000111   | 0.00210 ± 0.0000146   | 0.00590 ± 0.0000561    | 0.00370 ± 0.0000466  | 0.00550 ± 0.0000583   |

Table S9. Trace elemental analysis using ICP-MS.

| Metal ion<br>(mg/g)    | Cultivar           |                     |                     |                     |                     |                     |
|------------------------|--------------------|---------------------|---------------------|---------------------|---------------------|---------------------|
|                        | Alien Dawg         | Tangerine Dream     | Sensi Star          | Quadra              | Gabriola            | Island Honey        |
| <b>Boron (B)</b>       | 0.040 ± 0.003      | 0.031 ± 0.004       | 0.027 ± 0.003       | 0.028 ± 0.004       | 0.032 ± 0.003       | 0.032 ± 0.004       |
| <b>Magnesium (Mg)</b>  | 5.44 ± 0.03        | 4.01 ± 0.02         | 3.84 ± 0.05         | 4.16 ± 0.05         | 4.05 ± 0.02         | 6.62 ± 0.03         |
| <b>Phosphorous (P)</b> | 11.4 ± 0.9         | 7.69 ± 0.15         | 7.95 ± 0.34         | 9.88 ± 0.24         | 10.4 ± 0.2          | 10.6 ± 0.3          |
| <b>Potassium (K)</b>   | 46.9 ± 0.4         | 29.9 ± 0.5          | 44.7 ± 0.3          | 36.9 ± 0.6          | 44.4 ± 0.3          | 41.7 ± 0.4          |
| <b>Calcium (Ca)</b>    | 15.6 ± 0.3         | 9.24 ± 0.16         | 2.80 ± 0.25         | 6.74 ± 0.34         | 8.60 ± 0.26         | 14.9 ± 0.3          |
| <b>Titanium (Ti)</b>   | 0.0016 ± 0.0005    | 0.0011 ± 0.0004     | 0.0011 ± 0.0003     | 0.0011 ± 0.0004     | 0.0013 ± 0.0003     | 0.0011 ± 0.0004     |
| <b>Manganese (Mn)</b>  | 0.160 ± 0.002      | 0.160 ± 0.005       | 0.080 ± 0.004       | 0.089 ± 0.005       | 0.135 ± 0.003       | 0.124 ± 0.007       |
| <b>Iron (Fe)</b>       | 0.195 ± 0.005      | 0.087 ± 0.006       | 0.098 ± 0.007       | 0.216 ± 0.003       | 0.297 ± 0.006       | 0.198 ± 0.004       |
| <b>Copper (Cu)</b>     | 0.0025 ± 0.0004    | 0.0019 ± 0.0005     | 0.0061 ± 0.0004     | 0.0139 ± 0.0031     | 0.0146 ± 0.0023     | 0.0085 ± 0.0007     |
| <b>Zinc (Zn)</b>       | 0.0329 ± 0.0012    | 0.0478 ± 0.0009     | 0.0369 ± 0.0010     | 0.077 ± 0.005       | 0.132 ± 0.007       | 0.093 ± 0.005       |
| <b>Rubidium (Rb)</b>   | 0.0108 ± 0.0021    | 0.0085 ± 0.0009     | 0.0071 ± 0.0005     | 0.0119 ± 0.0006     | 0.0064 ± 0.0009     | 0.0149 ± 0.0010     |
| <b>Strontium (Sr)</b>  | 0.087 ± 0.011      | 0.059 ± 0.009       | 0.014 ± 0.002       | 0.064 ± 0.005       | 0.139 ± 0.012       | 0.207 ± 0.015       |
| <b>Molybdenum (Mo)</b> | 0.00088 ± 0.0005   | 0.0066 ± 0.0007     | 0.0064 ± 0.0005     | 0.0012 ± 0.0008     | 0.0019 ± 0.0007     | 0.0030 ± 0.0006     |
| <b>Cesium (Cs)</b>     | <LOQ               | <LOQ                | <LOQ                | <LOQ                | ND                  | 0.00004 ± 0.00001   |
| <b>Barium (Ba)</b>     | 0.0048 ± 0.0009    | <LOQ                | 0.0010 ± 0.0002     | 0.0016 ± 0.0002     | 0.0039 ± 0.0002     | 0.0066 ± 0.0005     |
| <b>Thallium (Tl)</b>   | 0.00001 ± 0.000009 | 0.000003 ± 0.000001 | 0.000002 ± 0.000001 | 0.000004 ± 0.000001 | 0.000003 ± 0.000001 | 0.000009 ± 0.000001 |

Table S10. Validation data for the targeted GC-MS assay for selected terpenoids.

| Terpenoid                 | Validation Parameter     |                          |              |               |
|---------------------------|--------------------------|--------------------------|--------------|---------------|
|                           | LOD ( $\mu\text{g/mL}$ ) | LOQ ( $\mu\text{g/mL}$ ) | Accuracy (%) | Precision (%) |
| <b>Camphene</b>           | 0.26                     | 0.78                     | 104          | 2.49          |
| <b>beta-Myrcene</b>       | 0.68                     | 2.05                     | 98           | 0.99          |
| <b>alpha-Phellandrene</b> | 0.28                     | 0.84                     | 82           | 1.34          |
| <b>3-Carene</b>           | 0.25                     | 0.75                     | 97           | 1.05          |
| <b>Eucalyptol</b>         | 0.39                     | 1.18                     | 101          | 2.84          |
| <b>E-beta-Ocimene</b>     | 0.78                     | 2.37                     | 92           | 1.05          |
| <b>cis-beta-Ocimene</b>   | 1.58                     | 4.78                     | 88           | 11.62         |
| <b>Fenchone</b>           | 0.26                     | 0.8                      | 107          | 1.72          |
| <b>Linalool</b>           | 3.9                      | 11.81                    | 88           | 8.5           |
| <b>Camphor</b>            | 0.47                     | 1.42                     | 97           | 1.02          |
| <b>(-)-Isopulegol</b>     | 4.09                     | 12.39                    | 90           | 1.97          |
| <b>Camphene</b>           | 0.26                     | 0.78                     | 104          | 2.49          |
| <b>beta-Myrcene</b>       | 0.68                     | 2.05                     | 98           | 0.99          |
| <b>alpha-Phellandrene</b> | 0.28                     | 0.84                     | 82           | 1.34          |
| <b>3-Carene</b>           | 0.25                     | 0.75                     | 97           | 1.05          |
| <b>Eucalyptol</b>         | 0.39                     | 1.18                     | 101          | 2.84          |

Table S11. Validation data for the LC-MS/MS assay for cannabinoids.

| Cannabinoid      | Validation Parameter |             |              |               |
|------------------|----------------------|-------------|--------------|---------------|
|                  | LOD (ng/mL)          | LOQ (ng/mL) | Accuracy (%) | Precision (%) |
| <b>CBC</b>       | 0.00278              | 0.00927     | 105          | 0.891         |
| <b>CBD</b>       | 0.00125              | 0.00417     | 102          | 7.97          |
| <b>CBDA</b>      | 0.00213              | 0.00710     | 92.9         | 1.26          |
| <b>CBDV</b>      | 0.00176              | 0.00587     | 96.0         | 3.45          |
| <b>CBDVA</b>     | 0.00115              | 0.00383     | 94.8         | 2.74          |
| <b>CBG</b>       | 0.00100              | 0.00333     | 92.6         | 5.43          |
| <b>CBGA</b>      | 0.00223              | 0.00743     | 94.3         | 3.91          |
| <b>CBL</b>       | 0.00100              | 0.00333     | 94.7         | 1.68          |
| <b>CBLA+CBCA</b> | 0.00426              | 0.0142      | 102          | 7.37          |
| <b>CBN</b>       | 0.00134              | 0.00447     | 93.2         | 6.93          |
| <b>CBNA</b>      | 0.00357              | 0.0119      | 96.6         | 2.95          |
| <b>THC</b>       | 0.00144              | 0.00480     | 91.3         | 5.89          |
| <b>THCA</b>      | 0.00208              | 0.00693     | 93.4         | 3.00          |
| <b>THC-COOH</b>  | 0.00100              | 0.00333     | 95.0         | 2.92          |
| <b>THCV</b>      | 0.00283              | 0.00943     | 96.0         | 2.97          |



Table S12. Validation data for the LC-MS/MS assay for polyphenols and phenolic acids.

| Polyphenol              | Validation Parameter  |                       |              |               |
|-------------------------|-----------------------|-----------------------|--------------|---------------|
|                         | LOD ( $\mu\text{M}$ ) | LOQ ( $\mu\text{M}$ ) | Accuracy (%) | Precision (%) |
| Apigenin                | 0.00142               | 0.00473               | 107          | 4.44          |
| Gallic acid             | 0.0866                | 0.28867               | 98.4         | 3.12          |
| p-Coumaric acid         | 0.599                 | 1.99667               | 122          | 1.78          |
| Protocatechuic aldehyde | 0.119                 | 0.39667               | 109          | 4.93          |
| Caffeic acid            | 0.108                 | 0.36                  | 109          | 3.31          |
| Quercetin               | 0.684                 | 2.28                  | 111          | 1.40          |
| Piceol                  | 0.198                 | 0.66                  | 108          | 3.24          |
| Vanillic acid           | 0.81                  | 2.7                   | 118          | 12.6          |
| Gallocatechin           | 1.11                  | 3.7                   | 120          | 2.09          |
| Pungenol                | 1.54                  | 5.13333               | 99.8         | 7.44          |
| Ferulic acid            | 0.512                 | 1.70667               | 113          | 0.797         |
| 3,4-Dihydrobenzoic acid | 3.17                  | 10.5667               | 87.8         | 5.10          |
| Vanillin                | 1.14                  | 3.8                   | 110          | 3.29          |
| Catechin                | 4.86                  | 16.2                  | 89.0         | 3.29          |

Table S13. Validation data for the LC-MS/MS assay for pesticides.

| Pesticide           | Validation Parameter               |                  |              |               |
|---------------------|------------------------------------|------------------|--------------|---------------|
|                     | Mandatory Testing Limits LOQ (ppm) | Method LOQ (ppm) | Accuracy (%) | Precision (%) |
| Acephate            | 0.02                               | 0.01             | 95.1139      | 9.8793        |
| Acetomiprid         | 0.1                                | 0.01             | 100.3861     | 10.0521       |
| Aldicarb            | 1.0                                | 0.01             | 87.4785      | 3.7203        |
| Allethrin           | 0.2                                | 0.02             | 96.9399      | 9.6752        |
| Azoxystrobin        | 0.02                               | 0.01             | 90.3565      | 11.4346       |
| Benzovindiflupyr    | 0.02                               | 0.002            | 112.0645     | 12.3517       |
| Bifenazate          | 0.02                               | 0.01             | 109.9349     | 7.7376        |
| Boscalid            | 0.02                               | 0.002            | 89.5125      | 12.8118       |
| Buprofezin          | 0.02                               | 0.002            | 94.3475      | 11.3523       |
| Carbaryl            | 0.05                               | 0.002            | 89.1919      | 1.9271        |
| Carbofuran          | 0.02                               | 0.01             | 99.1317      | 0.6727        |
| Chlorantraniliprole | 0.02                               | 0.002            | 106.7826     | 12.0125       |
| Chlorpyrifos        | 0.04                               | 0.01             | 105.4168     | 0.7387        |
| Clofentezine        | 0.02                               | 0.002            | 110.7223     | 11.5656       |
| Clothianidin        | 0.05                               | 0.01             | 105.8724     | 4.2674        |
| Coumaphos           | 0.02                               | 0.002            | 106.0628     | 13.7407       |
| Cyantraniliprole    | 0.02                               | 0.002            | 94.6362      | 5.0202        |
| Cyprodinil          | 0.25                               | 0.002            | 111.0254     | 2.3069        |
| Diazinon            | 0.02                               | 0.01             | 89.5809      | 11.4693       |
| Dichlorvos          | 0.1                                | 0.05             | 86.4422      | 10.7398       |
| Dimethoate          | 0.02                               | 0.01             | 95.3876      | 7.8982        |
| Dinotefuran         | 0.1                                | 0.02             | 111.3919     | 9.3833        |
| Dodemorph           | 0.05                               | 0.02             | 99.4976      | 3.5727        |
| Ethoprophos         | 0.02                               | 0.002            | 86.3213      | 4.8031        |
| Etofenprox          | 0.05                               | 0.002            | 89.2605      | 13.3854       |
| Etoxazole           | 0.02                               | 0.002            | 101.1975     | 11.8025       |

|                        |       |       |          |         |
|------------------------|-------|-------|----------|---------|
| <b>Fenoxycarb</b>      | 0.02  | 0.002 | 96.6048  | 6.6407  |
| <b>Fenpyroximate</b>   | 0.02  | 0.01  | 108.7202 | 2.6309  |
| <b>Fensulfothion</b>   | 0.02  | 0.02  | 99.0175  | 11.5267 |
| <b>Fenthion</b>        | 0.02  | 0.05  | 90.0848  | 13.9963 |
| <b>Flonicamid</b>      | 0.05  | 0.002 | 92.3141  | 11.7838 |
| <b>Fluopyram</b>       | 0.02  | 0.002 | 96.1215  | 2.9432  |
| <b>Hexythiazox</b>     | 0.01  | 0.002 | 99.9175  | 8.9576  |
| <b>Imazalil</b>        | 0.05  | 0.01  | 109.4439 | 3.3203  |
| <b>Imidacloprid</b>    | 0.02  | 0.01  | 88.5515  | 8.0378  |
| <b>Jasmolin</b>        | -     | 0.002 | 87.2922  | 6.2919  |
| <b>Kresoxim-Methyl</b> | 0.02  | 0.02  | 112.0663 | 6.1074  |
| <b>Malathion</b>       | 0.02  | 0.002 | 106.4088 | 12.8404 |
| <b>Metalaxyl</b>       | 0.02  | 0.002 | 92.2817  | 4.3747  |
| <b>Methiocarb</b>      | 0.02  | 0.002 | 101.9312 | 10.3135 |
| <b>Methoprene</b>      | 2.000 | 0.1   | 86.8098  | 7.5552  |
| <b>Mevinphos</b>       | 0.05  | 0.002 | 97.8242  | 14.4839 |
| <b>MGK-264</b>         | 0.05  | 0.002 | 105.4348 | 6.0173  |
| <b>Myclobutanil</b>    | 0.02  | 0.002 | 102.5578 | 10.8688 |
| <b>Naled</b>           | 0.1   | 0.002 | 114.0733 | 11.9469 |
| <b>Novaluron</b>       | 0.05  | 0.002 | 91.8589  | 7.0305  |
| <b>Oxamyl</b>          | 3.0   | 0.01  | 97.4211  | 12.2655 |
| <b>Paclobutrazol</b>   | 0.02  | 0.002 | 105.9366 | 12.3163 |
| <b>Phenothrin</b>      | 0.05  | 0.05  | 104.4569 | 4.0355  |
| <b>Phosmet</b>         | 0.02  | 0.002 | 91.3291  | 10.2884 |
| <b>Pirimicarb</b>      | 0.02  | 0.002 | 104.8624 | 5.6584  |
| <b>Prallethrin</b>     | 0.05  | 0.02  | 114.9826 | 1.6488  |
| <b>Propoxur</b>        | 0.02  | 0.002 | 114.4835 | 4.6464  |
| <b>Pyraclostrobin</b>  | 0.02  | 0.002 | 97.3278  | 4.0725  |
| <b>Pyrethrins</b>      | 0.05  | 0.01  | 86.8619  | 1.6585  |
| <b>Pyridaben</b>       | 0.05  | 0.01  | 107.3032 | 12.3557 |

|                           |      |       |          |         |
|---------------------------|------|-------|----------|---------|
| <b>Spinetoram</b>         | 0.02 | 0.002 | 96.2958  | 7.9388  |
| <b>Spinosad A</b>         | 0.1  | 0.002 | 107.8561 | 3.5409  |
| <b>Spinosad B</b>         | 0.1  | 0.002 | 107.4508 | 6.6883  |
| <b>Spiridiclofen</b>      | 0.25 | 0.2   | 107.0463 | 7.2558  |
| <b>Spiromesifin</b>       | 3.0  | 0.02  | 99.6787  | 12.2009 |
| <b>Spiroxamine</b>        | 0.1  | 0.002 | 108.2498 | 6.5045  |
| <b>Tebuconazole</b>       | 0.05 | 0.01  | 87.0511  | 12.1581 |
| <b>Tebufenozide</b>       | 0.02 | 0.002 | 113.6216 | 12.4449 |
| <b>Teflubenzuron</b>      | 0.05 | 0.002 | 94.6232  | 6.2443  |
| <b>Tetrachlorvinphos</b>  | 0.02 | 0.002 | 90.0878  | 7.1086  |
| <b>Tetramethrin</b>       | 0.1  | 0.01  | 98.7663  | 0.2898  |
| <b>Thiacloprid</b>        | 0.02 | 0.01  | 91.0345  | 12.7631 |
| <b>Thiametoxam</b>        | 0.02 | 0.002 | 106.7528 | 2.6952  |
| <b>Thiophanate-methyl</b> | 0.05 | 0.01  | 109.6889 | 1.1942  |
| <b>Trifloxystrobin</b>    | 0.02 | 0.002 | 102.4385 | 4.3888  |

Table S14. Validation data for the LC-MS/MS assay for metal ions.

| Element                | Validation Parameter  |                       |              |               |
|------------------------|-----------------------|-----------------------|--------------|---------------|
|                        | LOD ( $\mu\text{M}$ ) | LOQ ( $\mu\text{M}$ ) | Accuracy (%) | Precision (%) |
| <b>Boron (B)</b>       | 0.636                 | 2.27                  | 98           | 2.5           |
| <b>Magnesium (Mg)</b>  | 0.104                 | 0.417                 | 102          | 2.1           |
| <b>Phosphorous (P)</b> | 4.84                  | 16.1                  | 97           | 3.2           |
| <b>Potassium (K)</b>   | 2.56                  | 10.3                  | 101          | 3.5           |
| <b>Calcium (Ca)</b>    | 0.568                 | 1.14                  | 98           | 2.8           |
| <b>Titanium (Ti)</b>   | 0.0213                | 0.0532                | 99           | 4.1           |
| <b>Manganese (Mn)</b>  | 0.00455               | 0.00909               | 102          | 2.7           |
| <b>Iron (Fe)</b>       | 0.0358                | 0.179                 | 97           | 3.7           |
| <b>Copper (Cu)</b>     | 0.00315               | 0.0126                | 96           | 3.8           |
| <b>Zinc (Zn)</b>       | 0.0153                | 0.0612                | 98           | 2.6           |
| <b>Rubidium (Rb)</b>   | 0.000353              | 0.00118               | 101          | 3.9           |
| <b>Strontium (Sr)</b>  | 0.000568              | 0.00284               | 98           | 4.2           |
| <b>Molybdenum (Mo)</b> | 0.00258               | 0.0103                | 97           | 2.7           |
| <b>Cesium (Cs)</b>     | 0.000117              | 0.000376              | 96           | 3.2           |
| <b>Barium (Ba)</b>     | 0.000365              | 0.00182               | 99           | 3.6           |

**A** **Cannabis Database** Browse Search Downloads About Contact Us

Showing Compound Card for Cannabidiol (CDB000002)

Jump To Section: Identification Taxonomy Ontology Physical properties Spectra Protein target Pathways Concentrations Links References XMR

**Record Information**

|                             |                         |
|-----------------------------|-------------------------|
| Version                     | 1.0                     |
| Created at                  | 2020-03-19 00:35:16 UTC |
| Updated at                  | 2022-12-13 20:57:25 UTC |
| CannabisDB ID               | CDB000002               |
| Secondary Accession Numbers | Not Available           |

**Cannabis Compound Identification**

**Common Name** Cannabidiol

**Description** Cannabidiol (CBD) is one of at least 85 active cannabinoids identified within the Cannabis plant. It is a major phytocannabinoid, accounting for up to 40% of the Cannabis plant's extract, that binds to a wide variety of physiological targets of the endocannabinoid system within the body. Although the exact medical implications are currently being investigated, CBD has shown promise as a therapeutic and pharmaceutical drug target as an analgesic, anticonvulsant, muscle relaxant, anxiolytic, antipsychotic and has shown neuroprotective, anti-inflammatory, and antioxidant activity, among other currently investigated uses (PMID: 26218440 (1); PMID: 11628291 (1)). CBD's exact place within medical practice is still currently hotly debated. However as the body of evidence grows and legislation changes to reflect its wide-spread use, public and medical opinion have changed significantly with regards to its usefulness in a number of medical conditions ranging from anxiety to epilepsy. From a pharmacological perspective, Cannabis' (and CBD's) diverse receptor profile explains its potential application for such a wide variety of medical conditions. Cannabis contains more than 400 different chemical compounds, of which 61 are considered cannabinoids (PMID: 23409483 (1)). Cannabinoid receptors are utilized endogenously by the body through the endocannabinoid system, which includes a group of lipid proteins, enzymes, and receptors that are involved in many physiological processes. Through its modulation of neurotransmitter release, the endocannabinoid system regulates cognition, pain sensation, appetite, memory, sleep, immune function, and mood among many other bodily systems. [Read more...](#)

**Structure**

**B** **Cannabis Database** Browse Search Downloads About Contact Us

ChemQuery Search by molecular weight

Structure Search Molecular Weight

**Range search**

130 to 155

Molecular weight / Average mass  Monoisotopic mass

**Status (default all):**

Detected and quantified

Detected but not quantified

Expected but not quantified

Search Clear

Search Results 468 results

1 2 3 4 5 ... Next Last

**CDB004851** **Glutaconic acid** 1724-02-3

**Formula:** C<sub>7</sub>H<sub>6</sub>O<sub>4</sub>

**Monoisotopic mass:** 130.0256

**Molecular weight:** 130.1000

**C** **Cannabis Database** Browse Search Downloads About Contact Us

LC-MS Search LC-MS/MS Search GC-MS Search NMR Search

Search options

Search Results

Your input spectrum is shown on top in blue, and the closest matching result spectrum is shown underneath in red. Use the "Compare Spectrum" buttons on the results list below to view and compare different spectra with your input.

Input spectrum Current comparison result spectrum: Glycolic acid (CDB004803)

| Name/CAS Number           | Derivative Type | Molecular Weight / Formula | Derivative Molecular Weight / Formula | Structure | Retention Index Values | Matching Scores (1/2/3) | Spectral Display Tools                                                                                       |
|---------------------------|-----------------|----------------------------|---------------------------------------|-----------|------------------------|-------------------------|--------------------------------------------------------------------------------------------------------------|
| Glycolic acid (CDB004803) | 2 TMS           | 76.05                      | 220.417                               |           | 1042.4012              | 1.00 / 1.00 / 1.00      | Predicted<br><input type="button" value="View Spectrum"/><br><input type="button" value="Compare Spectrum"/> |

**Figure S1.** A screenshot montage showing A) the CCD MetaboCard for cannabidiol (CBD000002), B) the Search by molecular weight option with one of the results shown and C) the GC-MS Search option for glycolic acid (CDB004803).
